# Supplementary material for: Improvement of electrocatalytic water oxidation activity of novel copper complex by modulating the axial coordination of phosphate on metal center
Source: Royal Society of Chemistry journal article supplement (doi:10.1039/d3dt03409g), 2024-01-01
Supplement: d3dt03409g1.pdf [file d3dt03409g1.pdf]

**Improvement of electrocatalytic water oxidation activity of novel copper complex  
by modulating axial coordination of phosphate on metal center**

Jieying Wang,<sup>‡a</sup> Yezi Ping,<sup>‡a</sup> Yanmei Chen,<sup>a</sup> Shanshan Liu,<sup>a</sup> Jinfeng Dong,<sup>a</sup> Zhijun Ruan,<sup>\*a</sup>  
Xiangming Liang,<sup>\*b</sup> Junqi Lin<sup>\*a</sup>

<sup>a</sup> Hubei Key Laboratory of Processing and Application of Catalytic Materials, College of Chemistry and Chemical Engineering, Huanggang Normal University, Huanggang 438000, China.

E-mail: ruanzhijun@hgnu.edu.cn; linjunqi@hgnu.edu.cn

<sup>b</sup> School of Basic Medical Sciences, Ningxia Medical University, Yinchuan 750004, China.

E-mail: liangxm@nxmu.edu.cn

<sup>‡</sup> These authors contributed equally to this work.

**Synthesis of the bipyridine-based ligand 6,6'-bis(dimethylaminomethyl)-2,2'-bipyridine (dmabpy) and 6,6'-bis(methylaminomethyl)-2,2'-bipyridine (mabpy)**

**6,6'-Bis(bromomethyl)-2,2'-bipyridine:** A mixture of N-bromosuccinimide (NBS, 4.00 g, 22.4 mmol) and 6,6'-dimethyl-2,2'-bipyridine (2.00 g, 10.84 mmol) in  $\text{CHCl}_3$  (60 ml) was heated to 62 °C for half an hour. After the addition of catalytic benzoyl peroxide (800 mg, 3.30 mmol), the solution was refluxed at 62 °C for 16 h, cooled to room temperature and the solvent was removed. The yellow residue was triturated with MeOH ( $5 \times 15$  ml) and the white solid was recrystallized from chloroform to give the product as a white crystalline solid (0.385 g, 20.0 %).

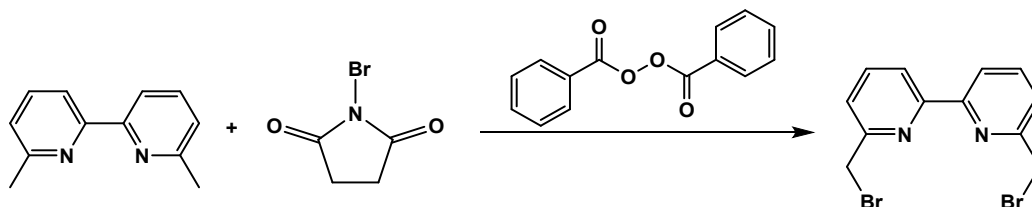

**Scheme S1** The synthesis procedure of precursor 6,6'-Bis(bromomethyl)-2,2'-bipyridine.

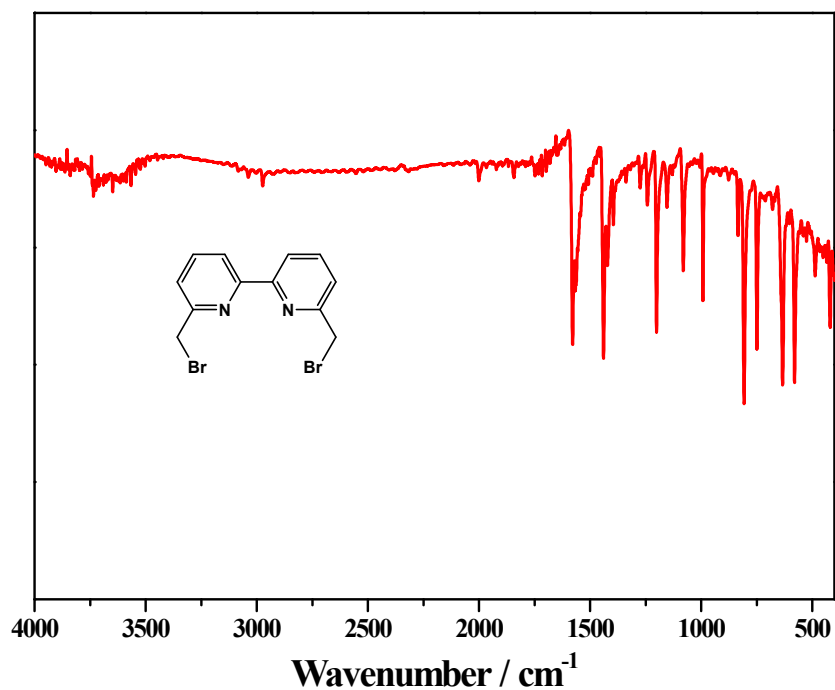

**Fig. S1** FT-IR spectrum of precursor 6,6'-Bis(bromomethyl)-2,2'-bipyridine.

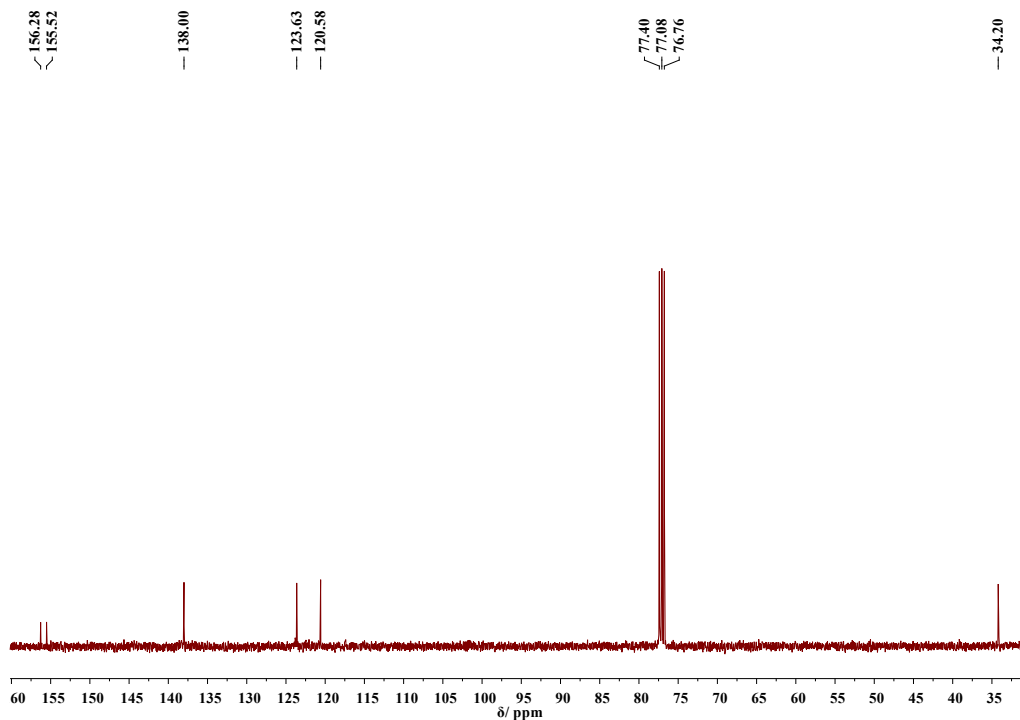

**Fig. S2** The  $^{13}\text{C}$  NMR (Bruker Avance III 400 MHz, chloroform-*d*) of 6,6'-Bis(bromomethyl)-2,2'-bipyridine:  $\delta$  156.2 ( $\text{C}_{\text{py}}$ ), 155.5 ( $\text{C}_{\text{py}}$ ), 138.0 ( $\text{C}_{\text{py}}$ ), 123.7 ( $\text{C}_{\text{py}}$ ), 120.6 ( $\text{C}_{\text{py}}$ ), 34.2 ( $\text{CH}_2$ ).

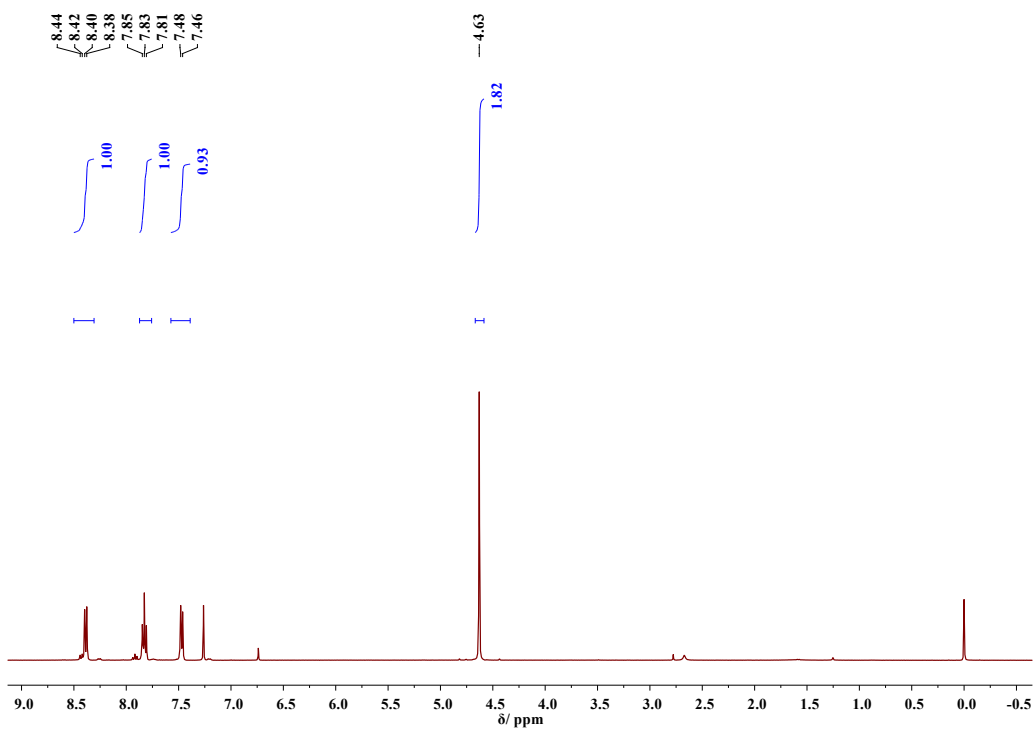

**Fig. S3** The  $^1\text{H}$  NMR (Bruker Avance III 400 MHz, chloroform-*d*) of 6,6'-Bis(bromomethyl)-2,2'-bipyridine:  $\delta$  8.40 (dd,  $J_{\text{HH}} = 7.8$  Hz,  $J_{\text{HH}} = 1.0$  Hz, 2H,  $\text{CH}_{\text{py}}$ ), 7.84 (t,  $J_{\text{HH}} = 7.8$  Hz, 2H,  $\text{CH}_{\text{py}}$ ), 7.47 (dd,  $^3J_{\text{HH}} = 7.8$ ,  $J_{\text{HH}} = 1.0$  Hz, 2H,  $\text{CH}_{\text{py}}$ ), 4.64 (s, 4H,  $\text{CH}_2$ ).

**dmabpy**: 6,6'-bis(bromomethyl)-2,2'-bipyridyl (0.268 g, 0.784 mmol) was dissolved in ethanol (10 mL). A 40% (w/w) aqueous solution of dimethylamine (4.0 ml, 8.0 mmol) was added dropwise. The mixture was refluxed at 80 °C for 16 h and then cooled to room temperature, the solvent was removed under reduced pressure. To deprotonate the compound, the white residue was dissolved in aqueous solution of NaOH (3 M, 10 ml). The solution was extracted with CH<sub>2</sub>Cl<sub>2</sub> (3 × 10 ml). The organic layers were combined, dried under anhydrous sodium sulfate and the solvent was removed under reduced pressure. The residue was dried under high vacuum and the dmabpy ligand was obtained as bright yellow solid (0.20 g, 94.3 %).

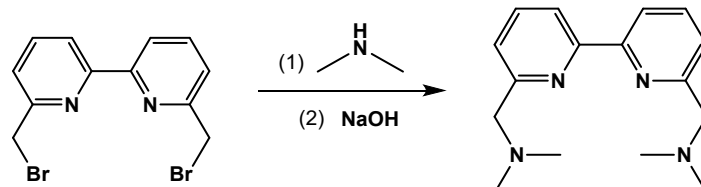

**Scheme S2** The synthesis procedure of the ligand dmabpy.

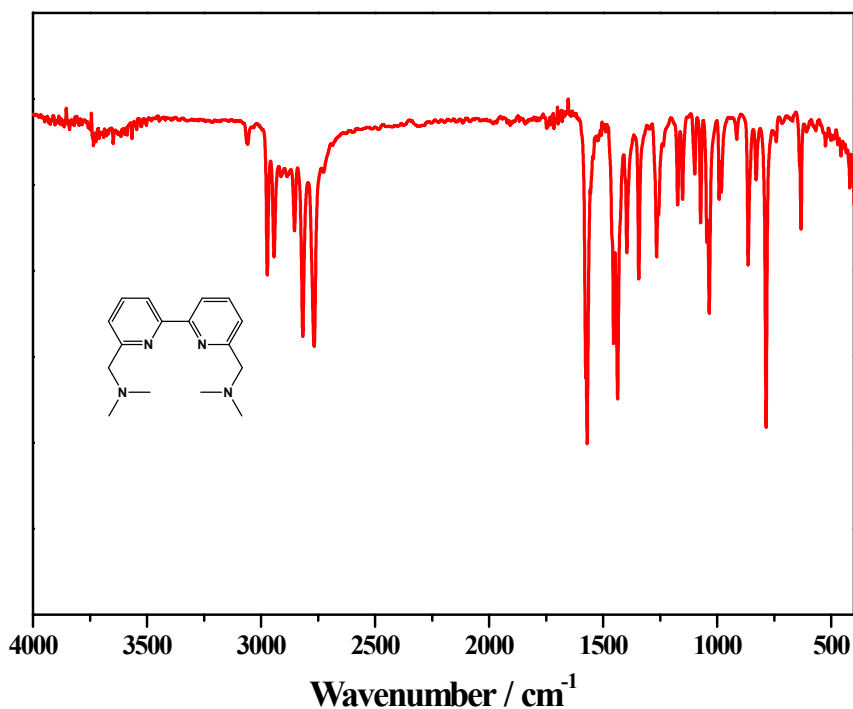

**Fig. S4** FT-IR spectrum of the ligand dmabpy.

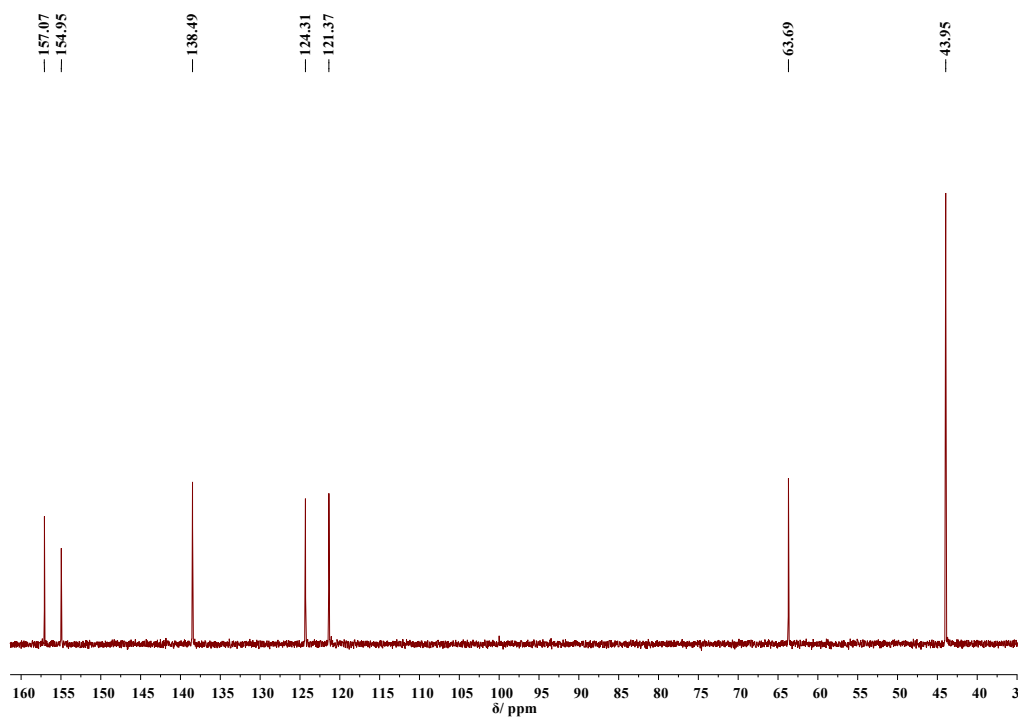

**Fig. S5**  $^{13}\text{C}$  NMR (Bruker Avance III 400 MHz, deuterium oxide) of dmabpy:  $\delta$  157.1 ( $\text{C}_{\text{py}}$ ), 155.0 ( $\text{C}_{\text{py}}$ ), 138.5 ( $\text{C}_{\text{py}}$ ), 124.3 ( $\text{C}_{\text{py}}$ ), 121.4 ( $\text{C}_{\text{py}}$ ), 63.7 ( $\text{CH}_2$ ), 44.0 ( $\text{CH}_3$ ).

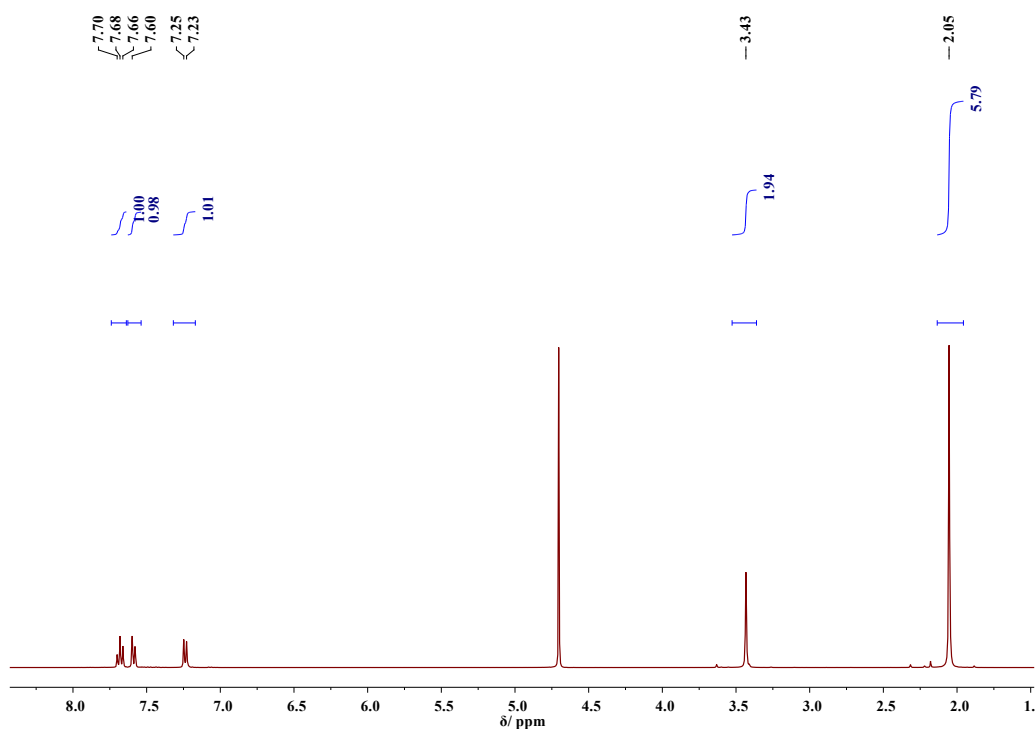

**Fig. S6** The  $^1\text{H}$  NMR (Bruker Avance III 400 MHz, deuterium oxide) of dmabpy:  $\delta$  7.76 (dd,  $J_{\text{HH}} = 7.9$ ,  $J_{\text{HH}} = 3.3$  Hz, 2H,  $\text{CH}_{\text{py}}$ ), 7.60 (t,  $J_{\text{HH}} = 7.9$  Hz, 2H,  $\text{CH}_{\text{py}}$ ), 7.24 (dd,  $J_{\text{HH}} = 7.9$ ,  $J_{\text{HH}} = 3.3$  Hz, 2H,  $\text{CH}_{\text{py}}$ ), 3.43 (s, 4H,  $\text{CH}_2$ ), 2.05 (s, 12H,  $\text{CH}_3$ ).

**mabpy**: The ligand mabpy was synthesized according to a similar preparation procedure as that of ligand dmabpy except that aqueous solution of methylamine was used instead of aqueous solution of dimethylamine. Ligand mabpy was formed as yellow oil (0.142 g, 75 %).

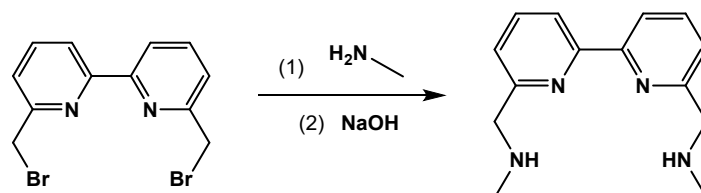

**Scheme S3** The synthesis procedure of the ligand mabpy.

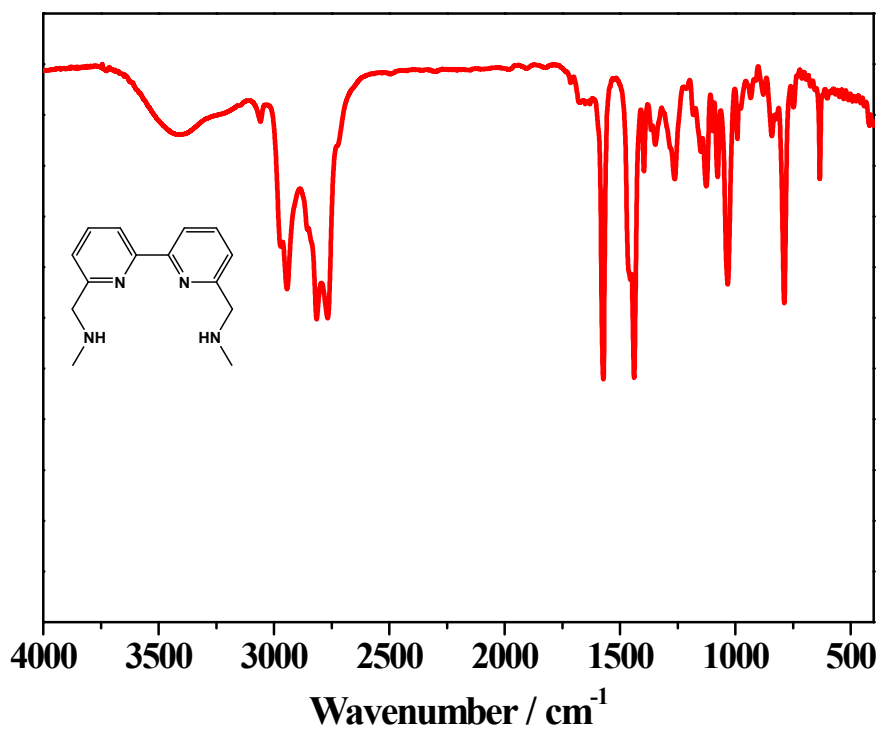

**Fig. S7** FT-IR spectrum of the ligand mabpy.

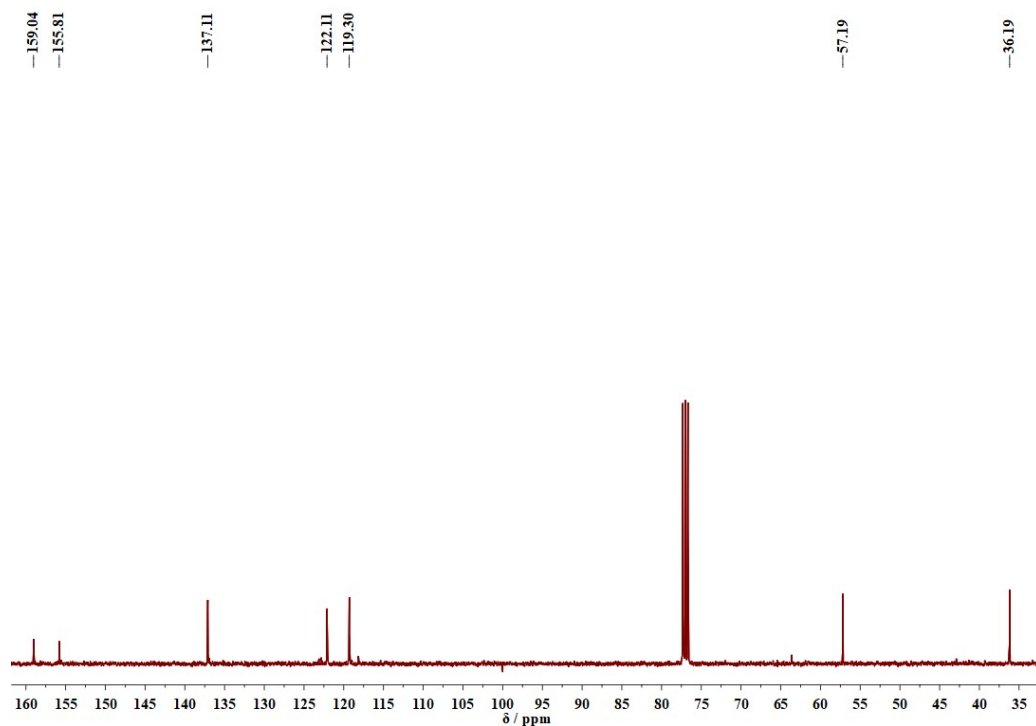

**Fig. S8**  $^{13}\text{C}$  NMR (Bruker Avance III 400 MHz, chloroform-*d*) of mabpy:  $\delta$  159.0 ( $\text{C}_{\text{py}}$ ), 155.8 ( $\text{C}_{\text{py}}$ ), 137.1 ( $\text{C}_{\text{py}}$ ), 122.1 ( $\text{C}_{\text{py}}$ ), 119.3 ( $\text{C}_{\text{py}}$ ), 57.2 ( $\text{CH}_2$ ), 36.2 ( $\text{CH}_3$ ).

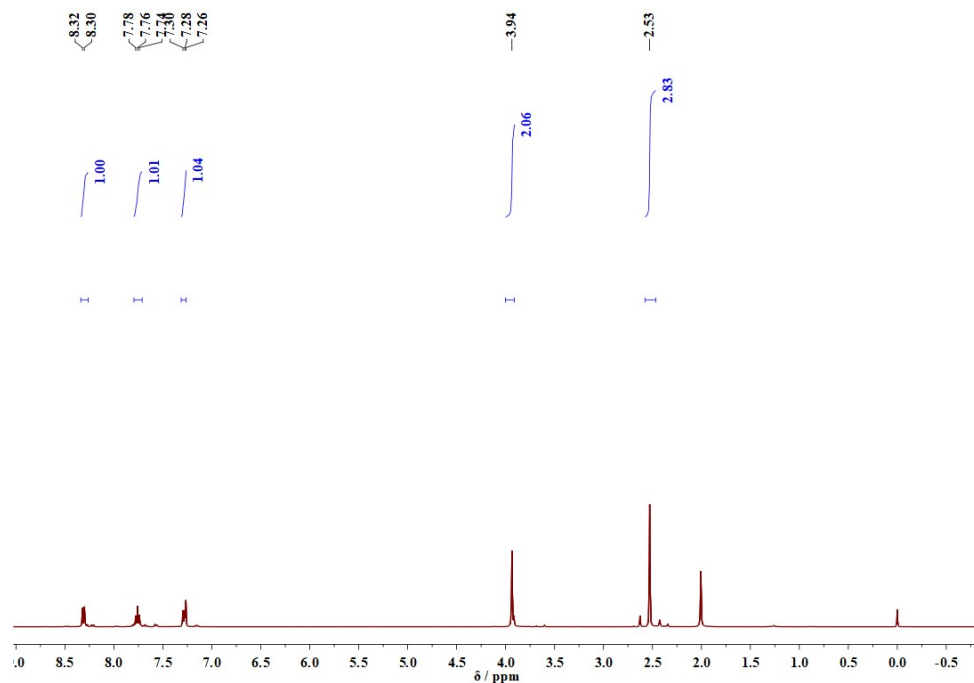

**Fig. S9** The  $^1\text{H}$  NMR (Bruker Avance III 400 MHz, chloroform-*d*) of mabpy:  $\delta$  8.31 (d,  $J_{\text{HH}} = 7.8$  Hz, 2H,  $\text{CH}_{\text{py}}$ ), 7.84 (t,  $J_{\text{HH}} = 7.7$  Hz, 2H,  $\text{CH}_{\text{py}}$ ), 7.47 (m, 2H,  $\text{CH}_{\text{py}}$ ), 3.94 (s, 4H,  $\text{CH}_2$ ), 2.53 (s, 6H,  $\text{CH}_2$ ), 2.01 (s, NH).

**Table S1** Crystallographic data and processing parameters for complexes **1**

| Complex parameters                                  | Complex <b>1</b>                                                                |
|-----------------------------------------------------|---------------------------------------------------------------------------------|
| Empirical formula                                   | C <sub>16</sub> H <sub>22</sub> Cl <sub>2</sub> N <sub>4</sub> CuO <sub>8</sub> |
| Formula weight                                      | 532.81                                                                          |
| Temperature / K                                     | 192.0                                                                           |
| Wavelength / Å                                      | 0.71073                                                                         |
| Crystal system                                      | Orthorhombic                                                                    |
| Space group                                         | Pnma                                                                            |
| <i>a</i> / Å                                        | 13.3806(4)                                                                      |
| <i>b</i> / Å                                        | 11.9359(4)                                                                      |
| <i>c</i> / Å                                        | 12.9332(5)                                                                      |
| <i>α</i> / deg                                      | 90                                                                              |
| <i>β</i> / deg                                      | 90                                                                              |
| <i>γ</i> / deg                                      | 90                                                                              |
| Volume / Å <sup>3</sup>                             | 2065.55(12)                                                                     |
| <i>Z</i>                                            | 4                                                                               |
| Calculated density / Mg m <sup>3</sup>              | 1.713                                                                           |
| Absorption coefficient / mm <sup>-1</sup>           | 1.370                                                                           |
| <i>F</i> (000)                                      | 1092                                                                            |
| Crystal size / mm <sup>3</sup>                      | 0.210 × 0.190 × 0.180                                                           |
| <i>θ</i> range / deg                                | 2.190 to 26.388                                                                 |
|                                                     | -16 ≤ <i>h</i> ≤ 16                                                             |
| Index ranges                                        | -14 ≤ <i>h</i> ≤ 14                                                             |
|                                                     | -16 ≤ <i>h</i> ≤ 16                                                             |
| Reflections collected                               | 43215                                                                           |
| Independent reflections                             | 2218 [ <i>R</i> (int) = 0.0793]                                                 |
| Completeness to theta                               | 99.9 % (25.099°)                                                                |
| Refinement method                                   | Full-matrix least-squares on <i>F</i> <sup>2</sup>                              |
| Data / restraints / parameters                      | 2218 / 7 / 153                                                                  |
| Goodness-of-fit on <i>F</i> <sup>2</sup>            | 1.039                                                                           |
| Final <i>R</i> indices [ <i>I</i> > 2σ( <i>I</i> )] | <i>R</i> <sub>1</sub> = 0.0287, <i>wR</i> <sub>2</sub> = 0.0728                 |
| <i>R</i> indices (all data)                         | <i>R</i> <sub>1</sub> = 0.0334, <i>wR</i> <sub>2</sub> = 0.0761                 |
| Largest diff. peak and hole                         | 1.673 and -1.747 e.Å <sup>-3</sup>                                              |

$$R_1 = \frac{\sum ||F_o| - |F_c||}{\sum |F_o|}, wR_2 = \left[ \frac{\sum (|F_o|^2 - |F_c|^2)^2}{\sum (F_o^2)} \right]^{1/2}$$



**Table S2** Selected bond lengths (Å) and angles (deg) for complexes **1**

| Complex           | <b>1</b>   |
|-------------------|------------|
| Bond length (Å)   |            |
| Cu1–N1            | 2.054(2)   |
| Cu1–N2            | 1.942(2)   |
| Cu1–N3            | 1.942(2)   |
| Cu1–N4            | 2.054(2)   |
| Bond angles (deg) |            |
| N1–Cu1–N2         | 82.25(8)   |
| N2–Cu1–N3         | 79.29(10)  |
| N3–Cu1–N4         | 82.25(8)   |
| N1–Cu1–N4         | 113.16(12) |

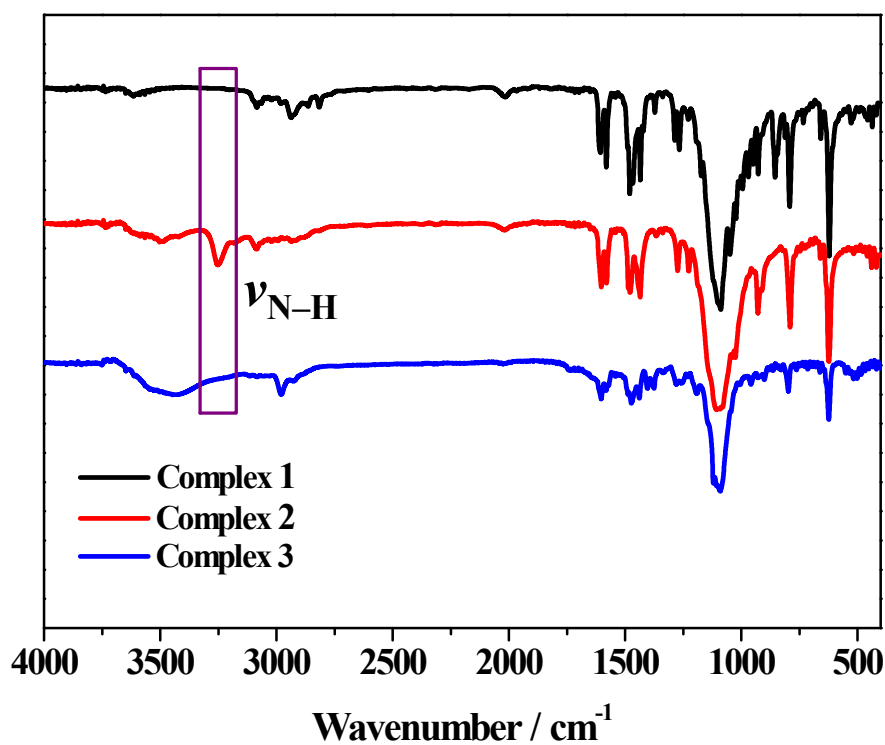**Fig. S10** FT-IR spectra of complex [Cu(dmabpy)](ClO<sub>4</sub>)<sub>2</sub> (**1**), complex [Cu(mabpy)](ClO<sub>4</sub>)<sub>2</sub> (**2**) and [Cu(*t*-bmabpy)](ClO<sub>4</sub>)<sub>2</sub> (**3**).

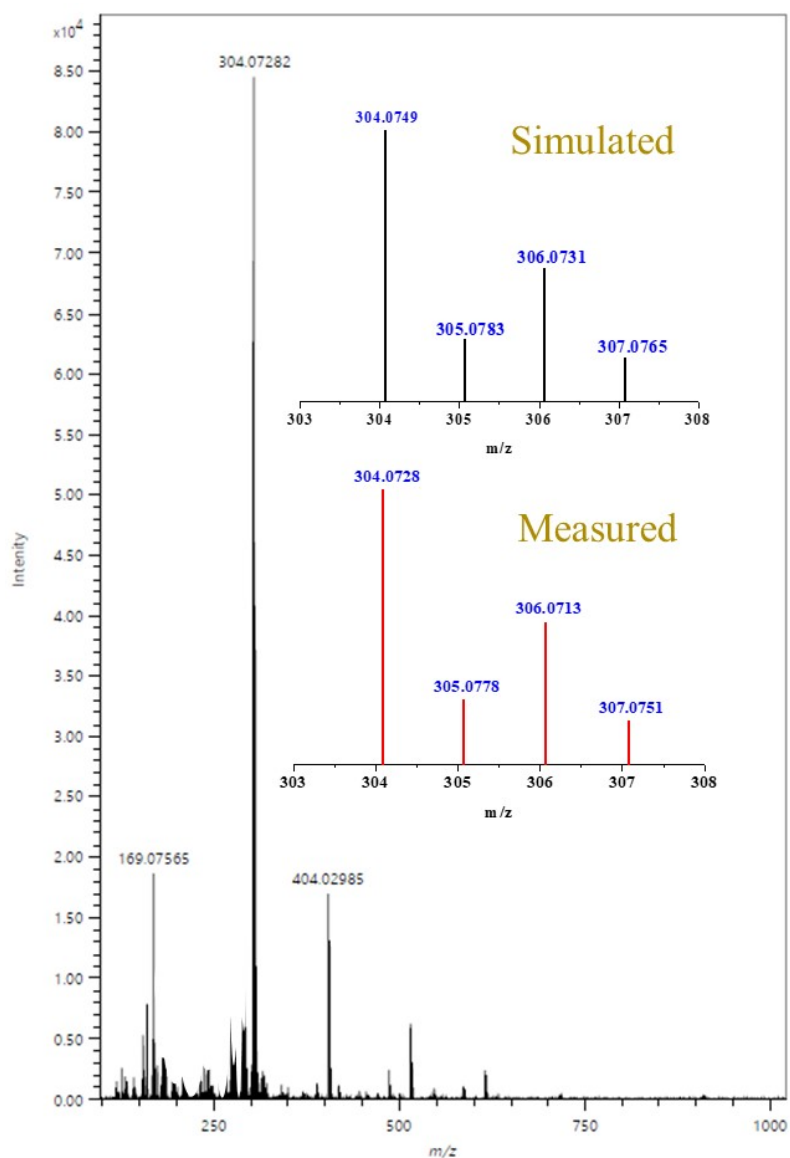

**Fig. S11** The measured and simulated high resolution mass spectrum peak of the fragment of  $[\text{Cu}(\text{mabpy})\text{-H}^+]^+$  from complex **2** dissolved in water.

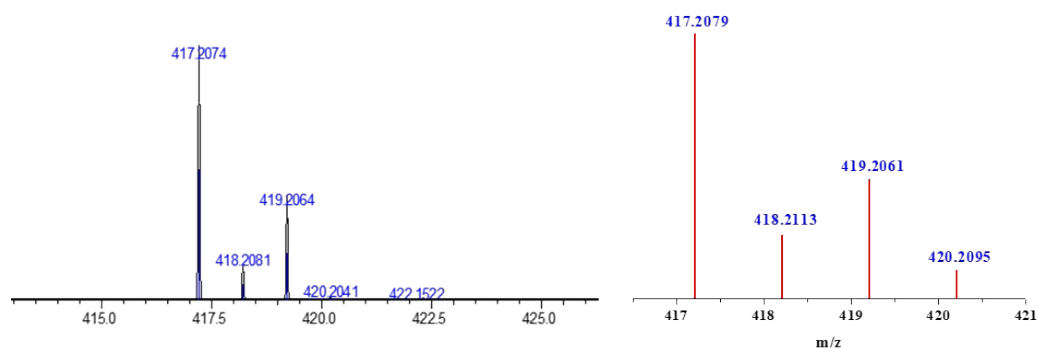

**Fig. S12** The measured (left) and simulated (right) high resolution mass spectrum peak the fragment of  $[\text{Cu}(t\text{-bmabpy})]^+$  from complex **3** dissolved in water.

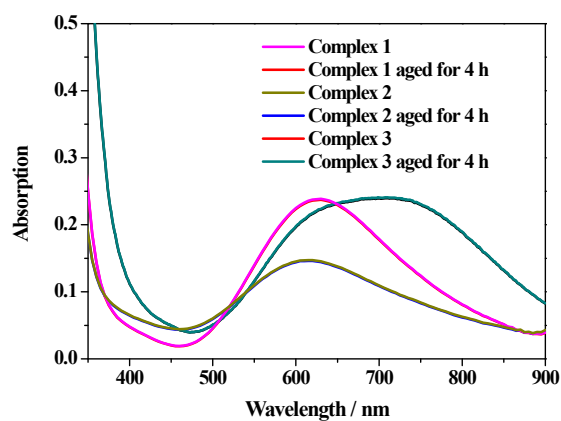

Fig. S13 UV-vis absorption of 1 mM of **1** and **2** in 0.1 M phosphate buffer solution at pH 9.0.

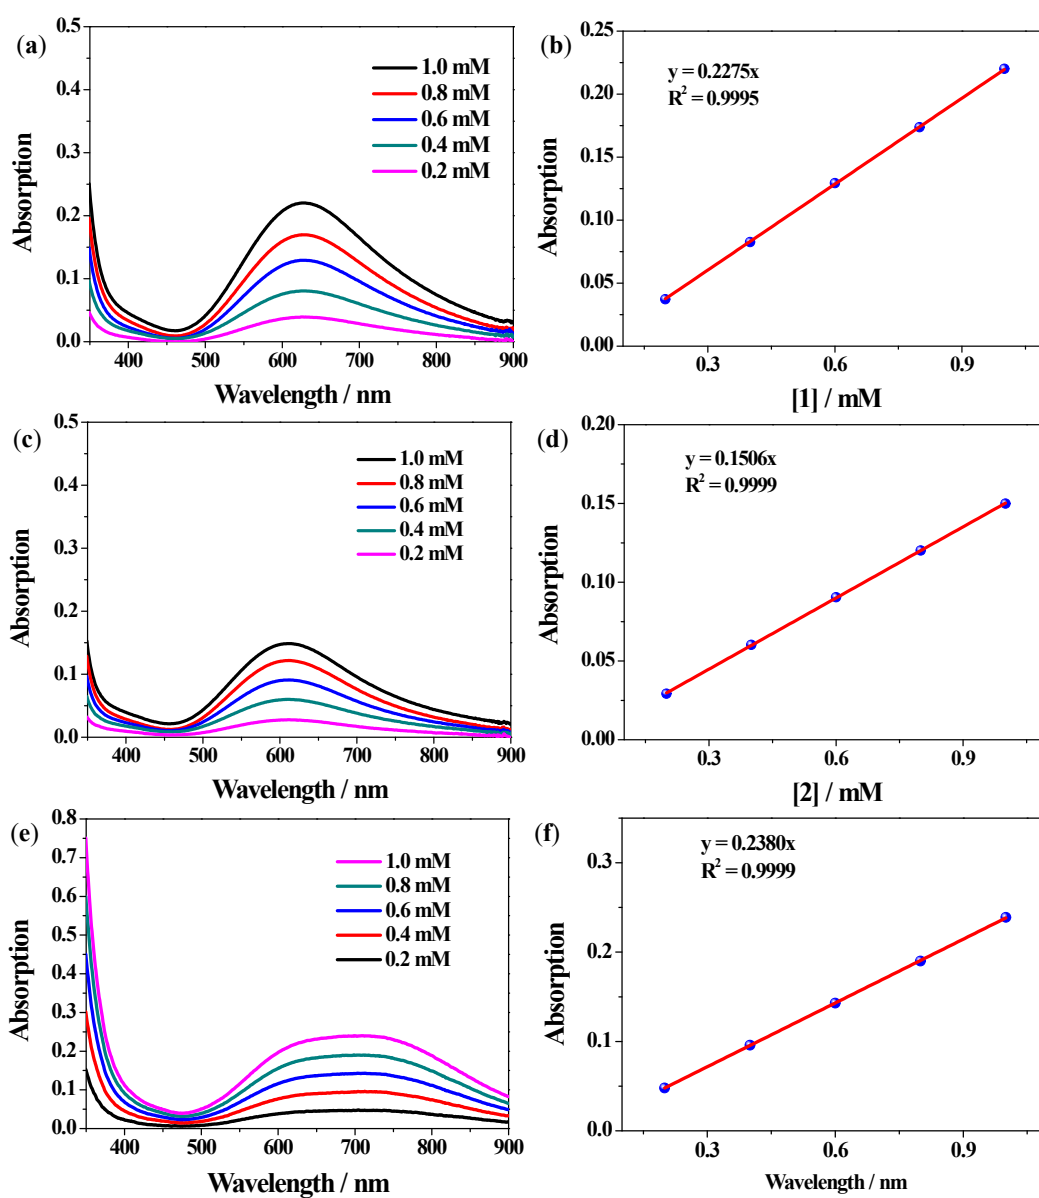

Fig. S14 Concentration -dependent UV-vis absorption spectra of **1** (a and b), **2** (c and d) and **3** (e and f) in PBS at pH 9.0.

**Table S3** The UV-vis absorption properties of complexes **1**, **2** and **3**.

| Complex  | $\lambda_{\max}$ / nm | $\epsilon$ / M <sup>-1</sup> cm <sup>-1</sup> |
|----------|-----------------------|-----------------------------------------------|
| <b>1</b> | 627                   | 227.5                                         |
| <b>2</b> | 611                   | 150.6                                         |
| <b>3</b> | 704                   | 238.0                                         |

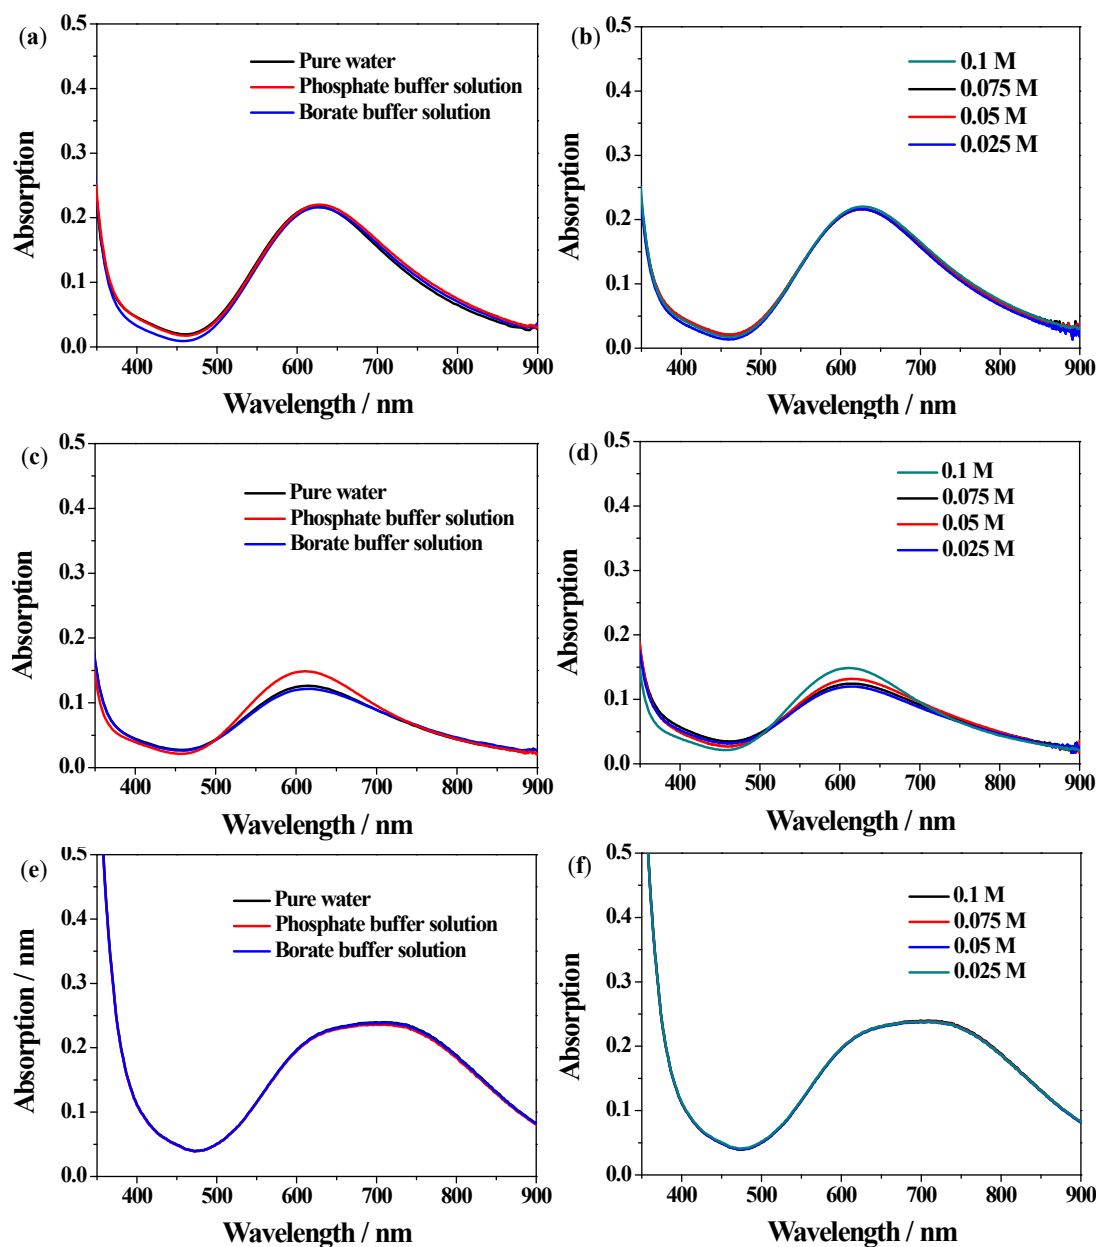**Fig. S15** UV-vis absorption spectra of 1 mM of complex **1** (a and b), **2** (c and d) and **3** (e and f) in pure water and 0.1 M different buffer solution at pH 9.0, and in PBS of various concentration at pH 9.0.

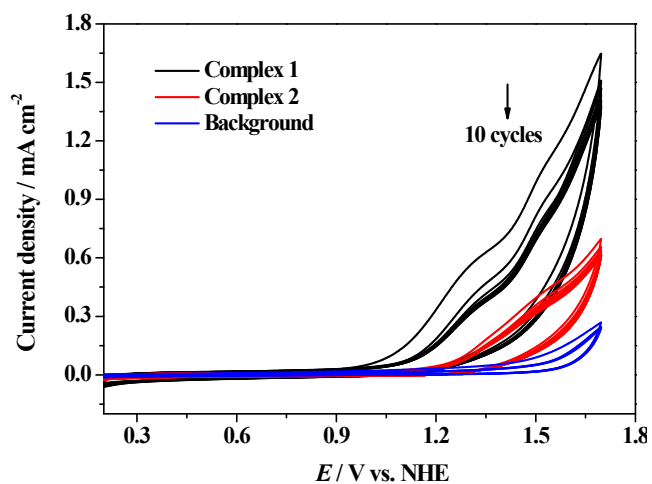

**Fig. S16** Consecutive CV cyclic scan curves of 1 mM of complexes **1** and **2** in 0.1 M PBS at pH 9.0, scan rate = 100 mV/s.

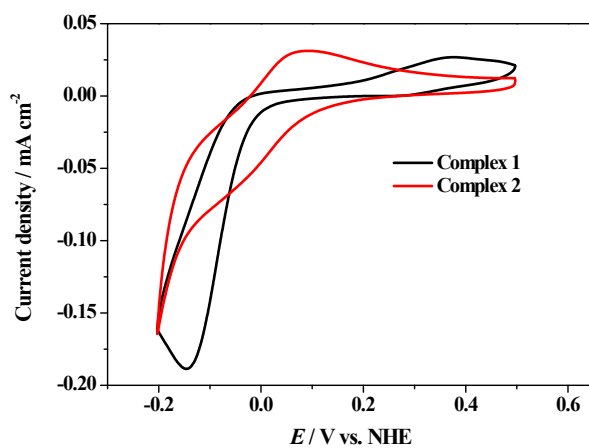

**Fig. S17** The Cu<sup>I</sup>/Cu<sup>II</sup> couple of complex **1** and **2** in 0.1 M PBS at pH 9.0, scan rate = 100 mV/s.

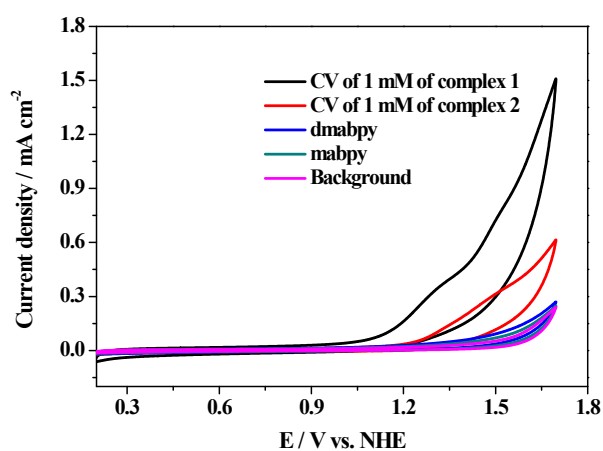

**Fig. S18** CV tests and rinse tests of 1 mM of complexes **1**, **2**, ligand dmabpy and mabpy in 0.1 M PBS at pH 9.0, scan rate = 100 mV s<sup>-1</sup>, GC electrode was used as the working electrode.

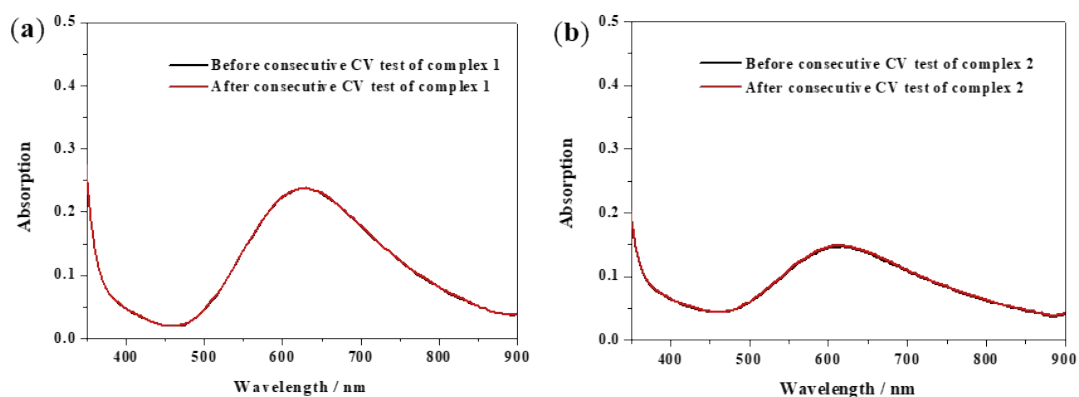

**Fig. S19** The UV-vis absorption spectra of the electrolyte containing complex **1** (a) and **2** (b) before and after consecutive CV test.

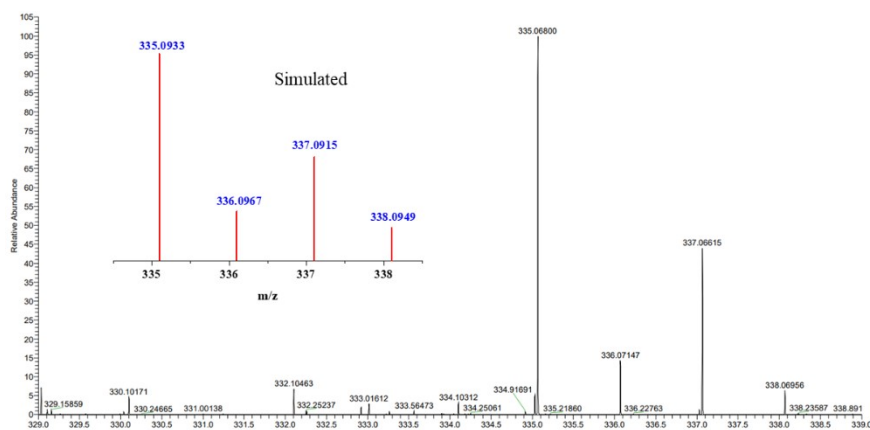

**Fig. S20** The measured and simulated high resolution mass spectrum peak of the fragment of  $[\text{Cu}(\text{dmabpy})(\text{OH})\text{-CH}_3]^+$  from complex **1** after consecutive CV test.

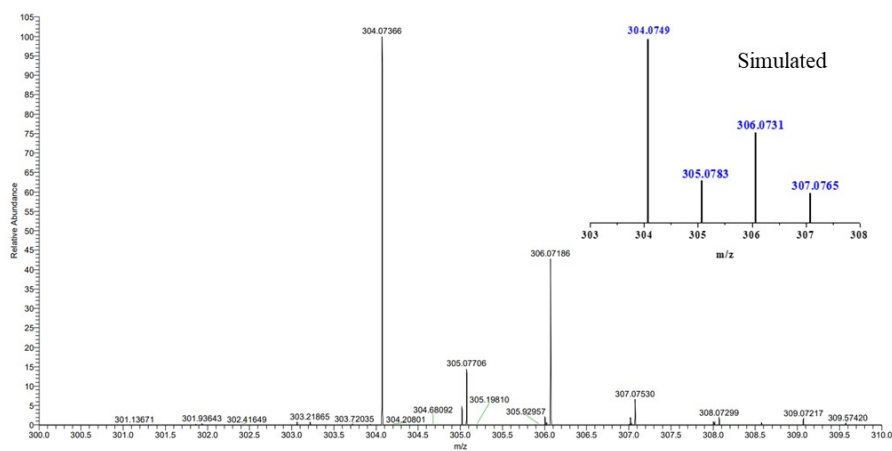

**Fig. S21** The measured and simulated high resolution mass spectrum peak of the fragment of  $[\text{Cu}(\text{mabpy})\text{-H}]^+$  from complex **2** after consecutive CV test.

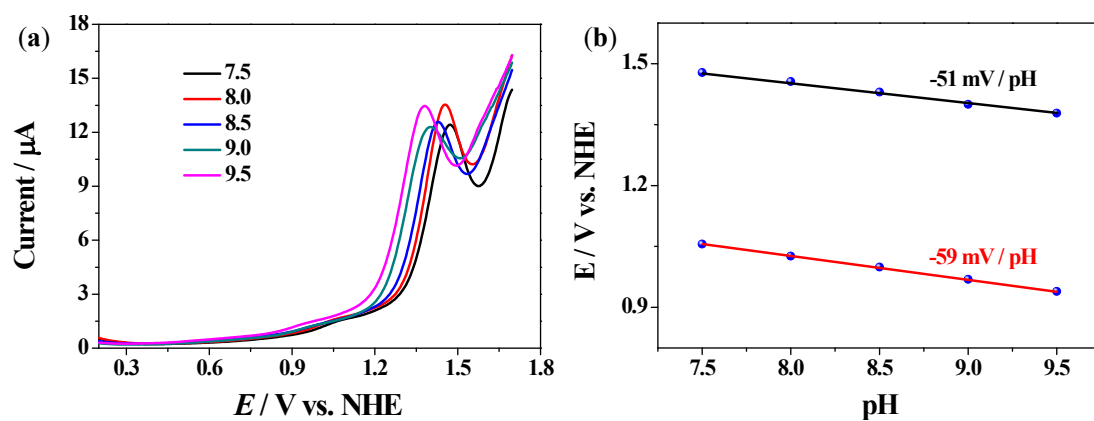

Fig. S22 DPV curves of 1 mM of complex 1 in 0.1 M PBS at various pH (a) and Pourbaix diagram of complex 1 in 0.1 M PBS pH range of 7.5–9.5 (b).

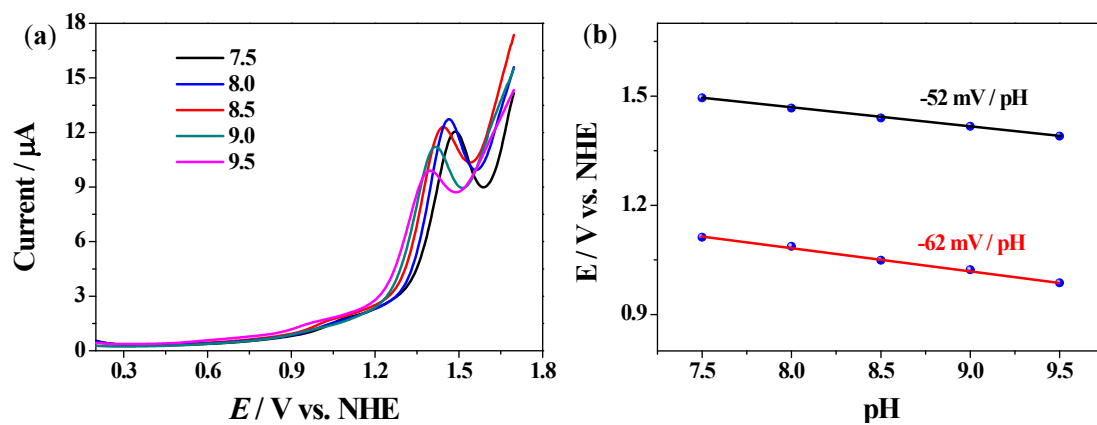

Fig. S23 DPV curves of 1 mM of complex 2 in 0.1 M PBS at various pH (a) and Pourbaix diagram of complex 2 in 0.1 M PBS pH range of 7.5–9.5 (b).

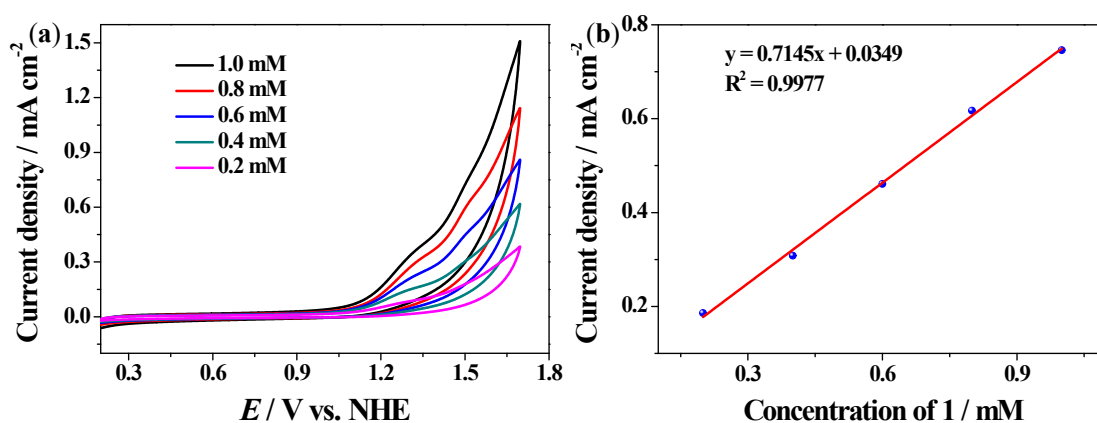

Fig. S24 CV of various concentration of 1 at pH 9.0 with scan rate of  $100 \text{ mV s}^{-1}$  (a) and the dependence of catalytic current density at 1.50 V vs. NHE on the concentration of 1 (b).

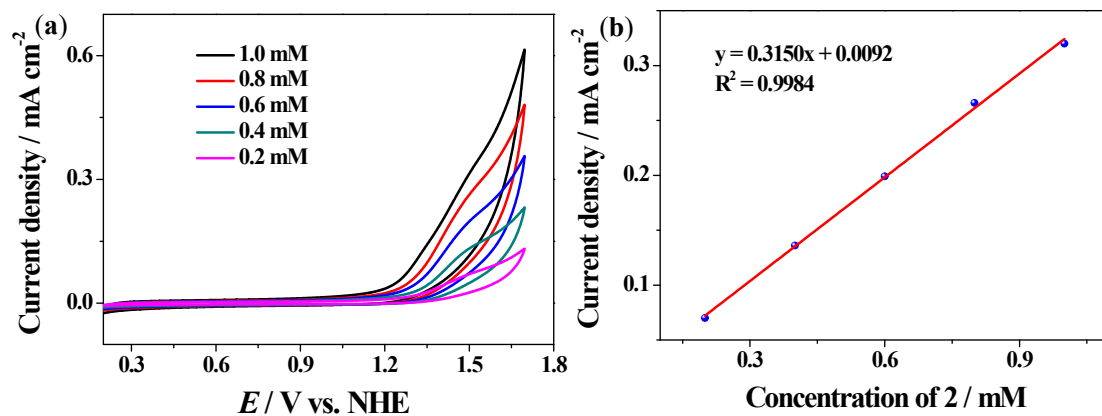

Fig. S25 CV of various concentration of **2** at pH 9.0 with scan rate of  $100 \text{ mV s}^{-1}$  (a) and the dependence of catalytic current density at  $1.50 \text{ V vs. NHE}$  on the concentration of **2** (b).

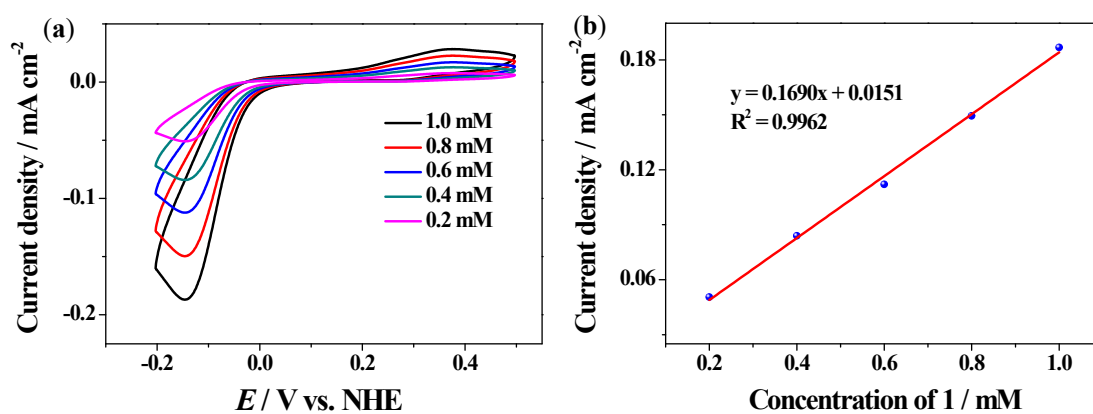

Fig. S26 Cyclic voltammograms of  $1.0 \text{ mM}$  of **1** with various concentration (a) and dependence of reduction wave current density of the  $\text{Cu}^{\text{I}}/\text{Cu}^{\text{II}}$  couple of **1** on its concentration (b).

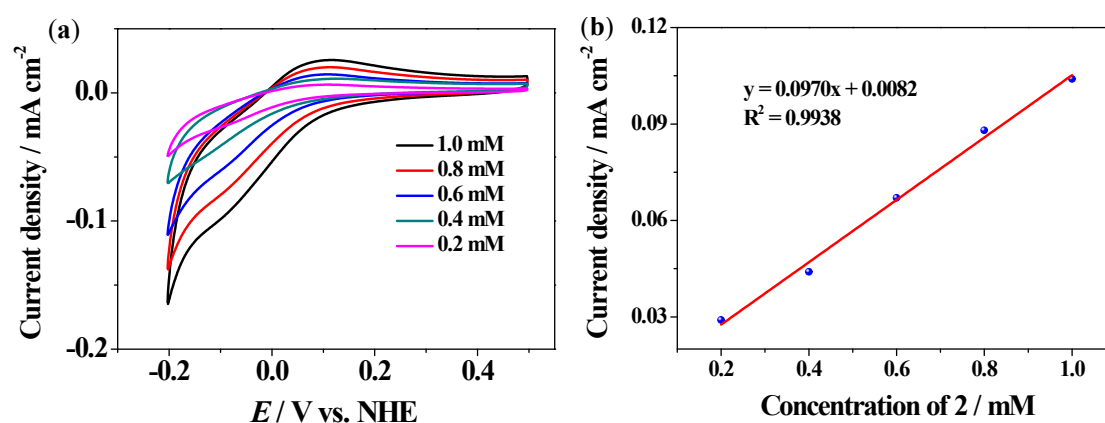

Fig. S27 Cyclic voltammograms of  $1.0 \text{ mM}$  of **2** with various concentration (a) and dependence of reduction wave current density of the  $\text{Cu}^{\text{I}}/\text{Cu}^{\text{II}}$  couple of **2** on its concentration (b).



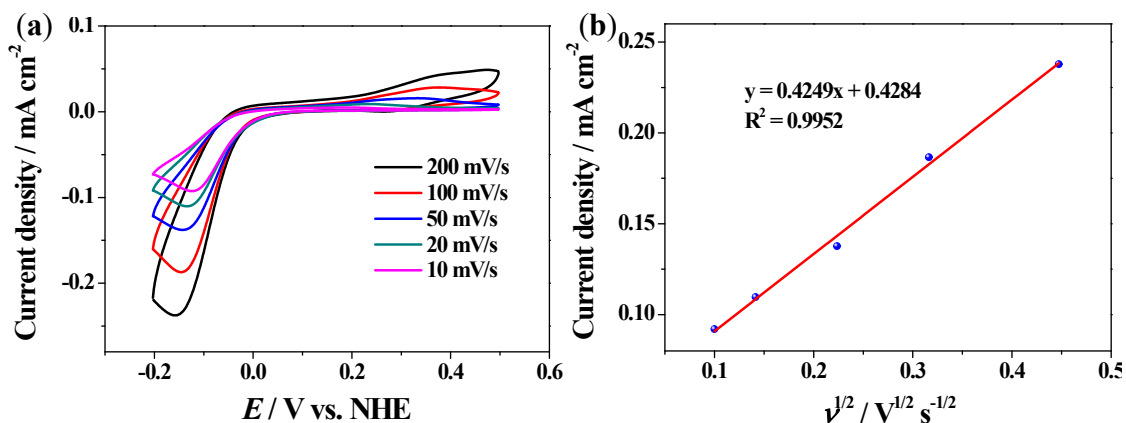

Fig. S28 CV of 1.0 mM of **1** with various scan rate (a) and dependence of reduction wave current density of the Cu<sup>I</sup>/Cu<sup>II</sup> couple of **1** on the square root of scan rates (b).

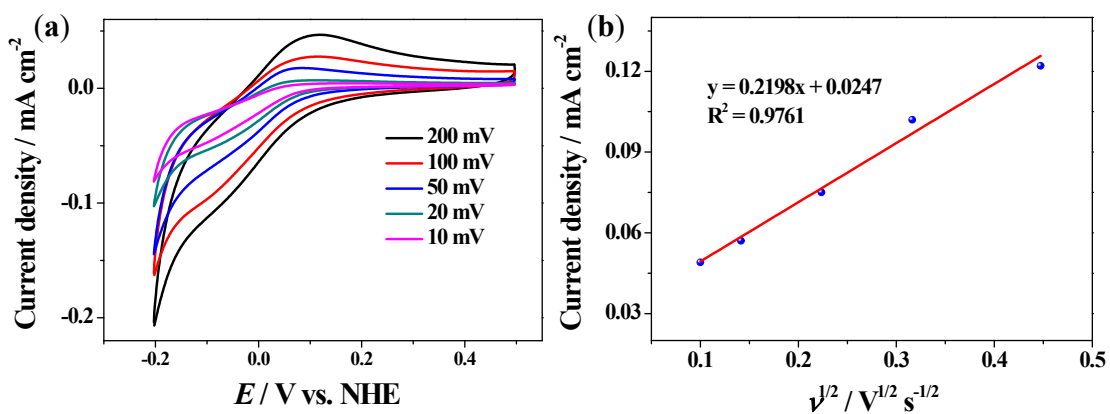

Fig. S29 CV of 1.0 mM of **2** with various scan rate (a) and dependence of reduction wave current density of the Cu<sup>I</sup>/Cu<sup>II</sup> couple of **2** on the square root of scan rates (b).

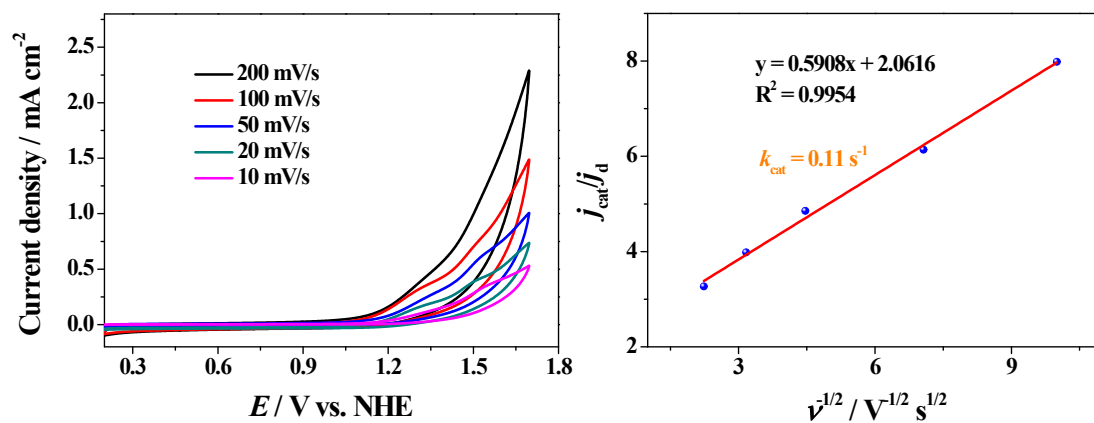

Fig. S30 CV of 1.0 mM of **1** in 0.1 M PBS with scan rate varying from 10 to 200 mV s<sup>-1</sup> (a) and plots of the ratio of  $j_{\text{cat}}$  to  $j_{\text{d}}$  of **1** versus the reciprocal of the square root of the scan rate (b).

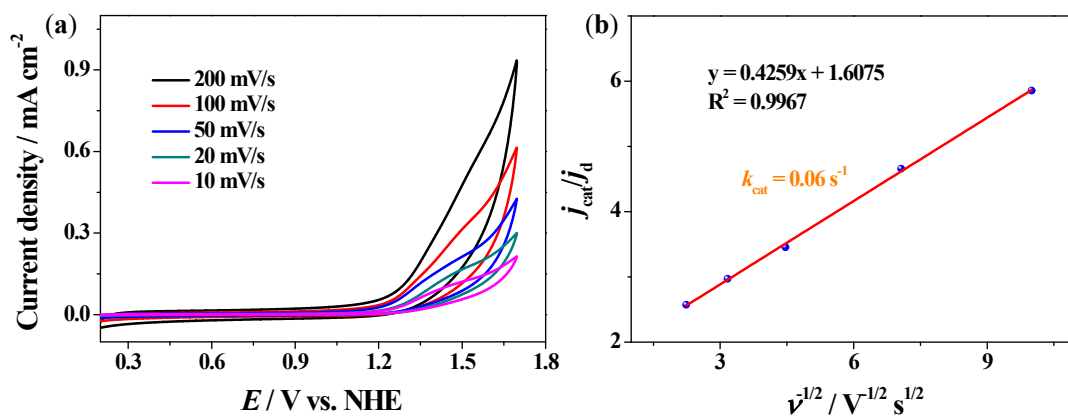

**Fig. S31** CV of 1.0 mM of **2** in 0.1 M PBS with scan rate varying from 10 to 200 mV s<sup>-1</sup> (a) and plots of the ratio of  $j_{\text{cat}}$  to  $j_{\text{d}}$  of **2** versus the reciprocal of the square root of the scan rate (b).

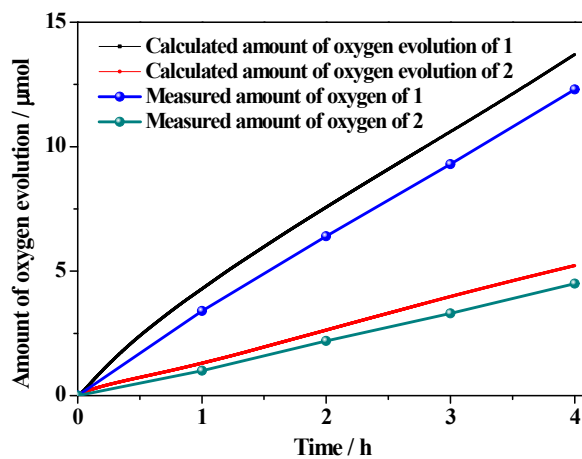

**Fig. S32** Faradaic efficiency of O<sub>2</sub> evolution for **1** (a) and **2** (b) under 4 h of electrolysis at 1.50 V vs. NHE in 0.1 M PBS at pH 9.0.

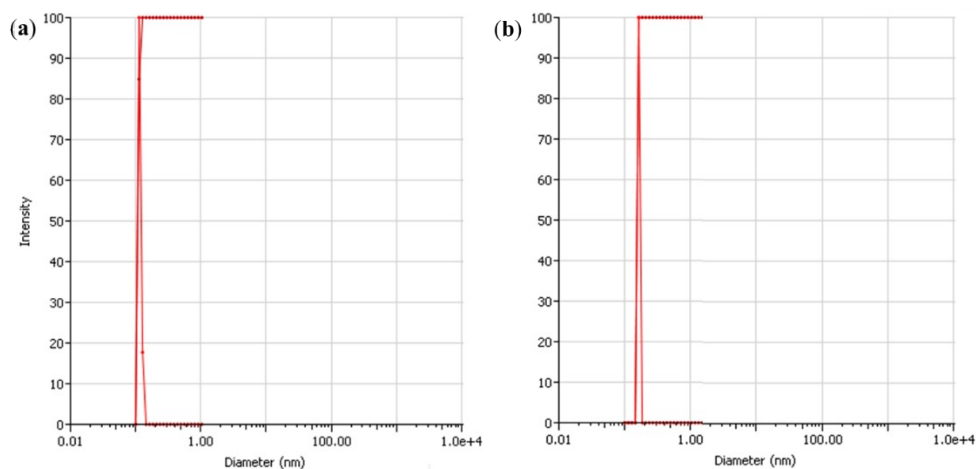

**Fig. S33** The dynamic light scattering (DLS) measurement of the solutions after CPE experiment of complex **1** (a) and **2** (b).

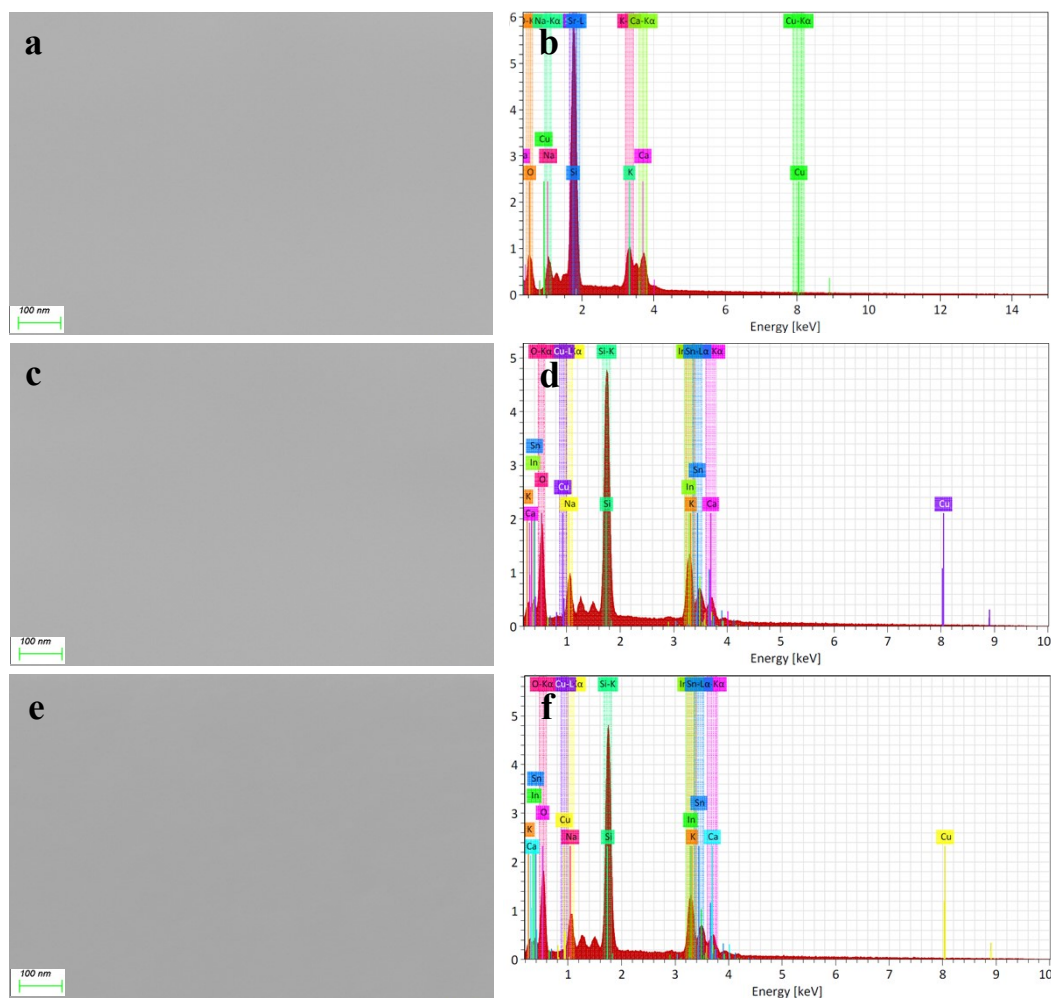

**Fig. S34** SEM images and EDX analysis result of the surface of ITO electrode before (a and b) and after 4 h CPE experiments of **1** (c and d) and **2** (e and f) in 0.1 M PBS at pH 9.0.

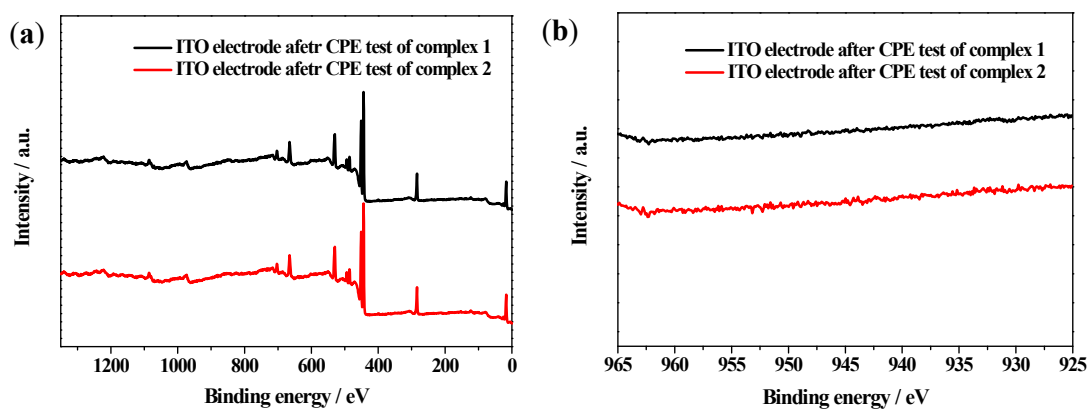

**Fig. S35** Full scan of XPS spectra of ITO electrode before and after CPE test with complex **1** and **2** as catalyst (a). XPS spectra of Cu element on ITO electrode before and after CPE test with complex **1** and **2** (b).

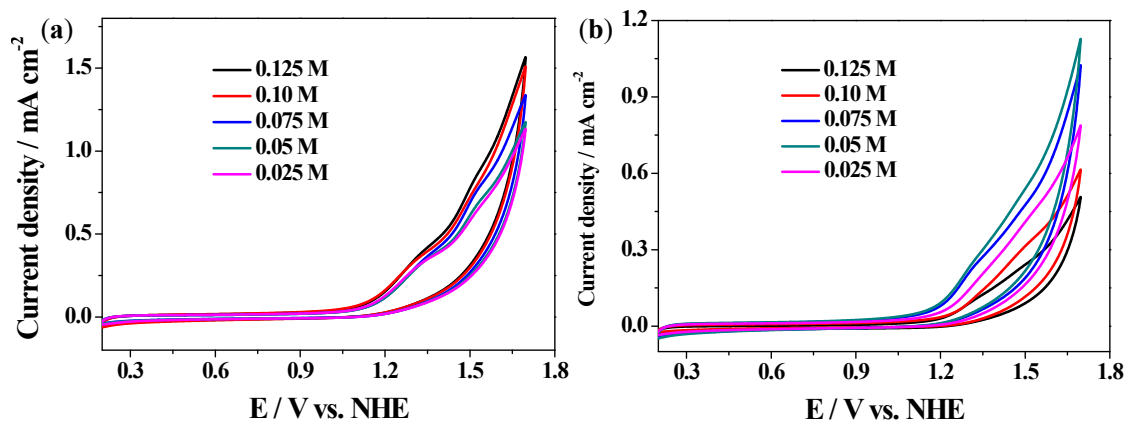

Fig. S36 CV of 1.0 mM of **1** (a) and **2** (b) in pH 9.0 PBS with different concentration.

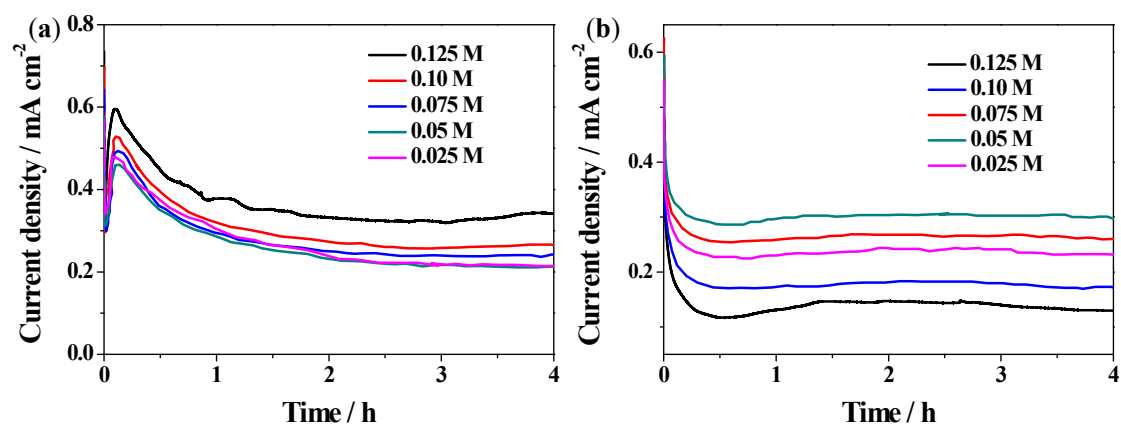

Fig. S37 Catalytic current obtained at the controlled potential electrolysis in the presence of 1 mM complex **1** and **2** using an FTO electrode (1 cm × 2 cm, 1 cm<sup>2</sup> immersed in electrolyte) in PBS (various concentration, pH 9.0) at 1.50 V vs. NHE.

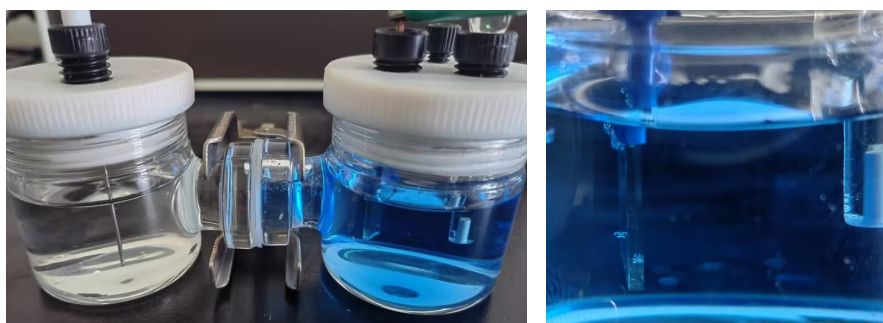

Fig. S38 The photograph of the H-shape electrolyte cell and the oxygen generated on the surface of ITO electrode during the CPE test of complex **1**.

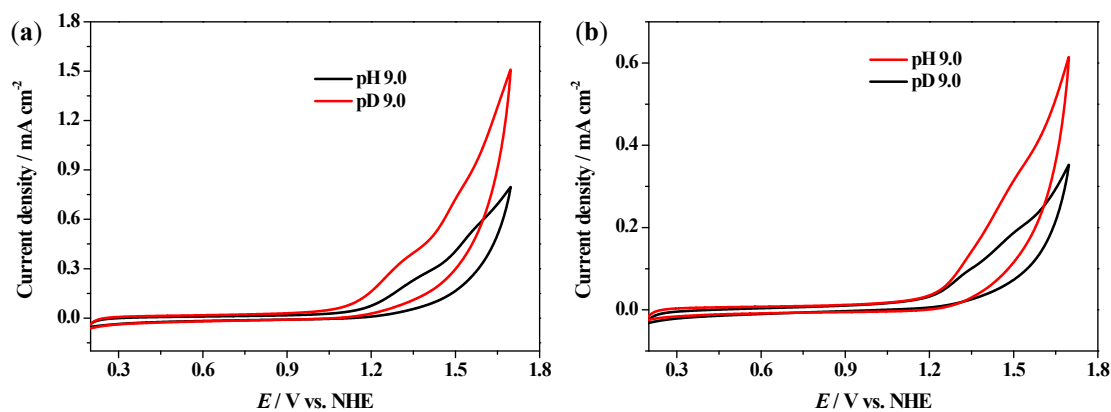

**Fig. S39** CV complex **1** (a) and **2** (b) in H<sub>2</sub>O or D<sub>2</sub>O PBS at pH 9.0, scan rate of 100 mV s<sup>-1</sup>.

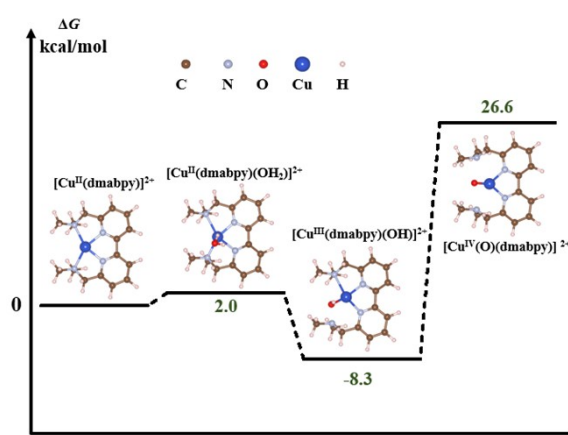

**Fig. S40** Relative free energy ( $\Delta G$ ) diagram of the oxidation process of complex **1**. DFT calculations were conducted through the Vienna ab initio Simulation Package (VASP) with the projector augmented wave method. Generalized gradient approximation of the Perdew-Burke-Ernzerhof (PBE) functional was used as the exchange-correlation functional. The Brillouin zone was sampled with  $2 \times 2 \times 1$  K points for surface calculation. The cutoff energy was set as 500 eV, and structure relaxation was performed until the convergence criteria of energy and force reached  $1 \times 10^{-5}$  eV and  $0.02 \text{ eV \AA}^{-1}$ , respectively. A vacuum layer of 15  $\text{\AA}$  was constructed to eliminate interactions between periodic structures of surface models. The van der Waals (vdW) interaction was amended by the zero damping DFT-D3 method of Grimme. The Gibbs free energy was calculated as  $\Delta G = \Delta E + \Delta \text{EZPE} - T\Delta S$ , where the  $\Delta E$ ,  $\Delta \text{EZPE}$ , and  $\Delta S$  are electronic energy, zero-point energy, and entropy difference between products and reactants. The zero-point energies of isolated and adsorbed intermediate products were calculated from the frequency analysis. The vibrational frequencies and entropies of molecules in the gas phase were obtained from the National Institute of Standards and Technology (NIST) database.

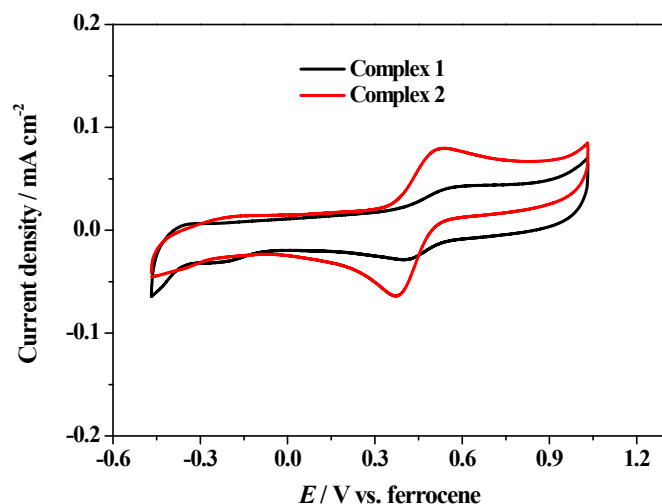

**Fig. S41** The CV curves of complex **1** and **2** in anhydrous acetonitrile (0.1 M of tetrabutyl ammonium hexafluorophosphate is used as electrolyte) at 100 mV/s.

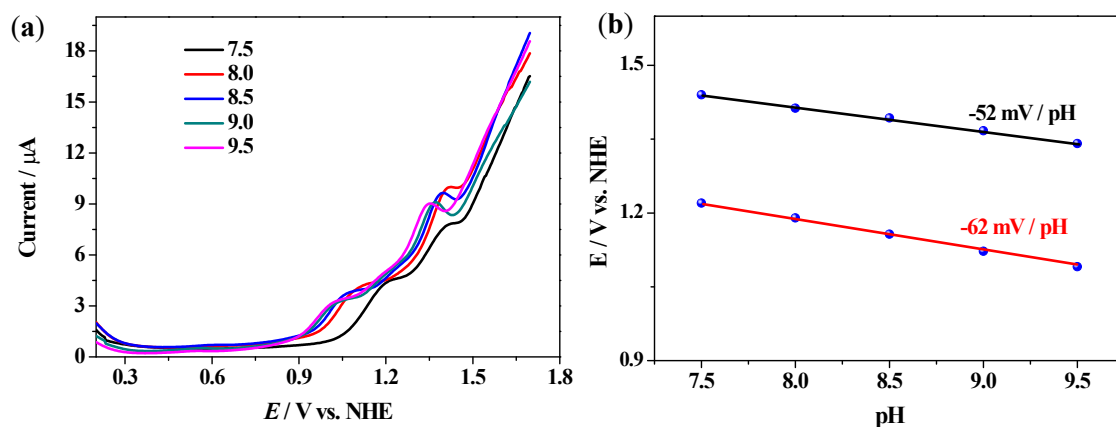

**Fig. S42** DPV curves (a) and Pourbaix diagram (b) of 1 mM of **3** in 0.1 M PBS at various pH.

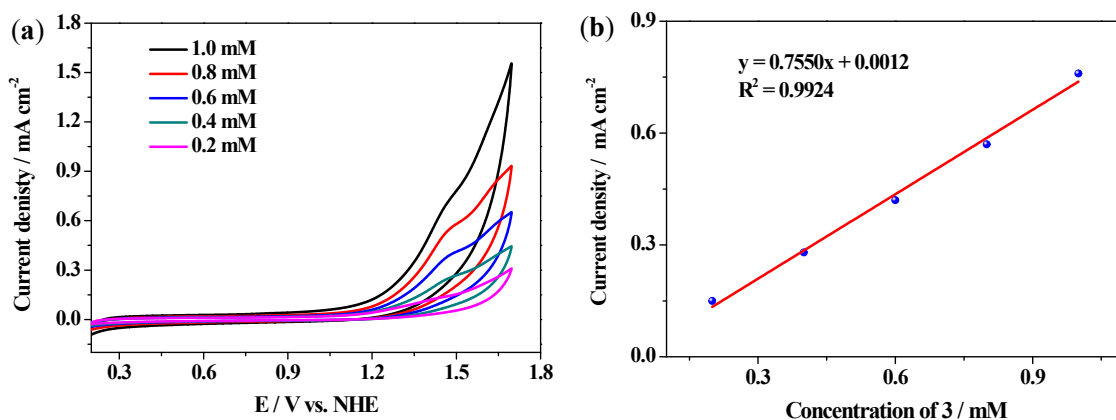

**Fig. S43** CV of various concentration of **3** at pH 9.0 with scan rate of 100 mV s<sup>-1</sup> (a) and the dependence of catalytic current density at 1.48 V vs. NHE on the concentration of **3** (b).

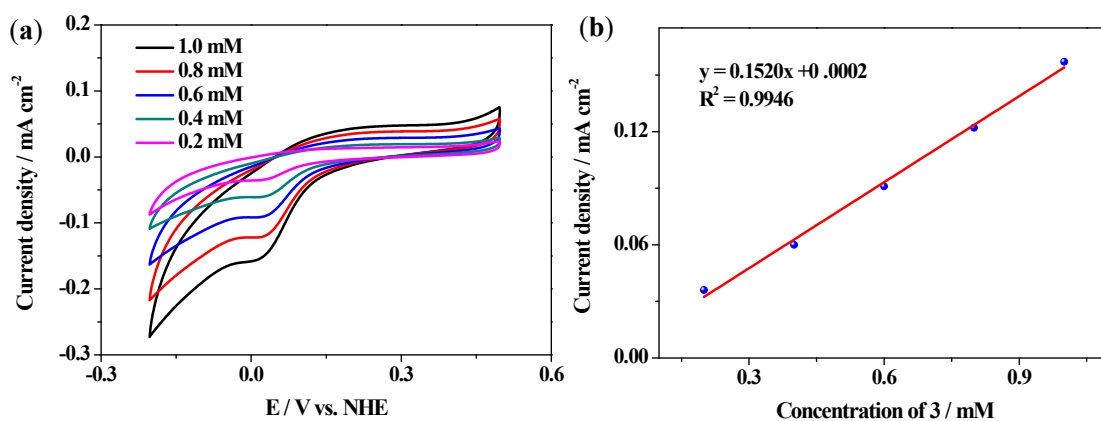

**Fig. S44** Cyclic voltammograms of 1.0 mM of **3** with various concentration (a) and dependence of anodic wave current density of the Cu<sup>I</sup>/Cu<sup>II</sup> couple of **3** on its concentration (b).

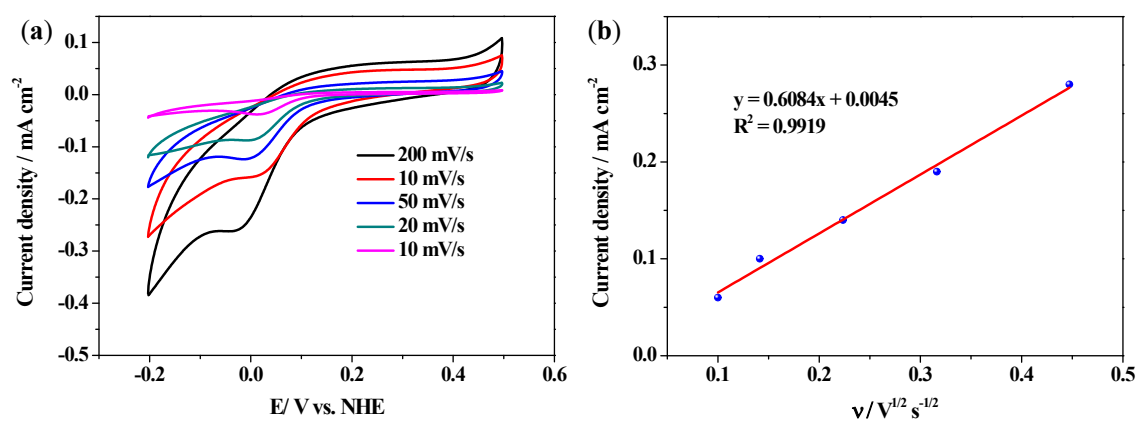

**Fig. S45** CV of 1.0 mM of **3** with various scan rate (a) and dependence of reduction wave current density of the Cu<sup>I</sup>/Cu<sup>II</sup> couple of **3** on the square root of scan rates (b).

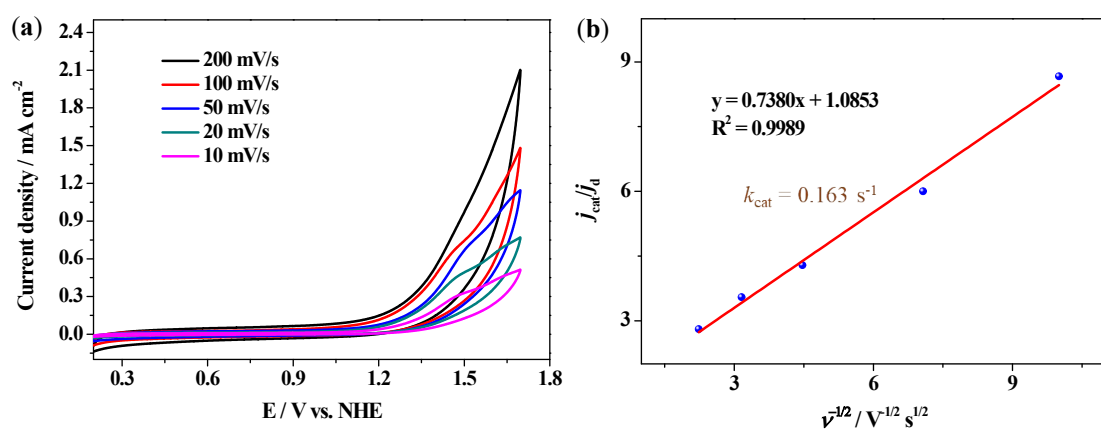

**Fig. S46** CV of 1.0 mM of **3** in 0.1 M PBS with scan rate varying from 10 to 200 mV s<sup>-1</sup> (a) and plots of the ratio of  $j_{cat}$  to  $j_d$  of **3** versus the reciprocal of the square root of the scan rate (b).

**Table S4** Overpotential of homogeneous electrochemical water oxidation catalyzed by some reported Cu-based water oxidation catalysts

| Catalyst <sup>a</sup>                                             | pH   | $\eta$ /mV <sup>b</sup> | Ref.      |
|-------------------------------------------------------------------|------|-------------------------|-----------|
| (bpy)Cu(OH) <sub>2</sub>                                          | 13.1 | 750                     | S7        |
| [(Me <sub>2</sub> TMPA)( $\mu$ -OH)Cu] <sub>2</sub> <sup>2+</sup> | 12.5 | 636                     | S8        |
| [Cu <sup>II</sup> (L)] <sup>2+</sup>                              | 12.0 | 830                     | S9        |
| [L <sub>Glu</sub> -Cu] <sub>4</sub>                               | 12.0 | 880                     | S10       |
| [L <sub>Gly</sub> -Cu] <sub>4</sub>                               | 12.0 | 880                     | S10       |
| [(L4)Cu] <sup>2-</sup>                                            | 11.6 | 754                     | S11       |
| [Cu(N <sub>2</sub> Py <sub>3</sub> )] <sup>2+</sup>               | 12.0 | 831                     | S12       |
| [(opba)Cu] <sup>2-</sup>                                          | 10.8 | 636                     | S13       |
| [Cu(Me <sub>2</sub> oxpn)Cu(OH) <sub>2</sub> ]                    | 10.4 | 636                     | S14       |
| [L-Cu-CO <sub>3</sub> H] <sup>-</sup>                             | 10.0 | 650                     | S15       |
| [CuL <sub>2</sub> ] <sup>2+</sup>                                 | 9.20 | 602                     | S16       |
| [Cu <sub>2</sub> (BPMAN)( $\mu$ -OH)] <sup>3+</sup>               | 7.0  | 800                     | S17       |
| CuMe <sub>4</sub> cyclam                                          | 7.0  | 880                     | S18       |
| [Cu(I)(C2)] <sup>+</sup>                                          | 6.5  | 674                     | S19       |
| Cu <sub>2</sub> (BEE) <sub>2</sub>                                | 9.35 | 470                     | S20       |
| CuPcTS                                                            | 9.5  | 570                     | S21       |
| [(L1)Cu(OH <sub>2</sub> )] <sup>2+</sup>                          | 9.0  | 730                     | S22       |
| [(L2)Cu(OH <sub>2</sub> )] <sup>2+</sup>                          | 9.0  | 330                     | S22       |
| Complex <b>1</b>                                                  | 9.0  | 600                     | This work |

<sup>a</sup> The structures of the catalysts listed in this table are given below. <sup>b</sup>  $\eta$  = onset overpotential obtained from CV test (vs. NHE).



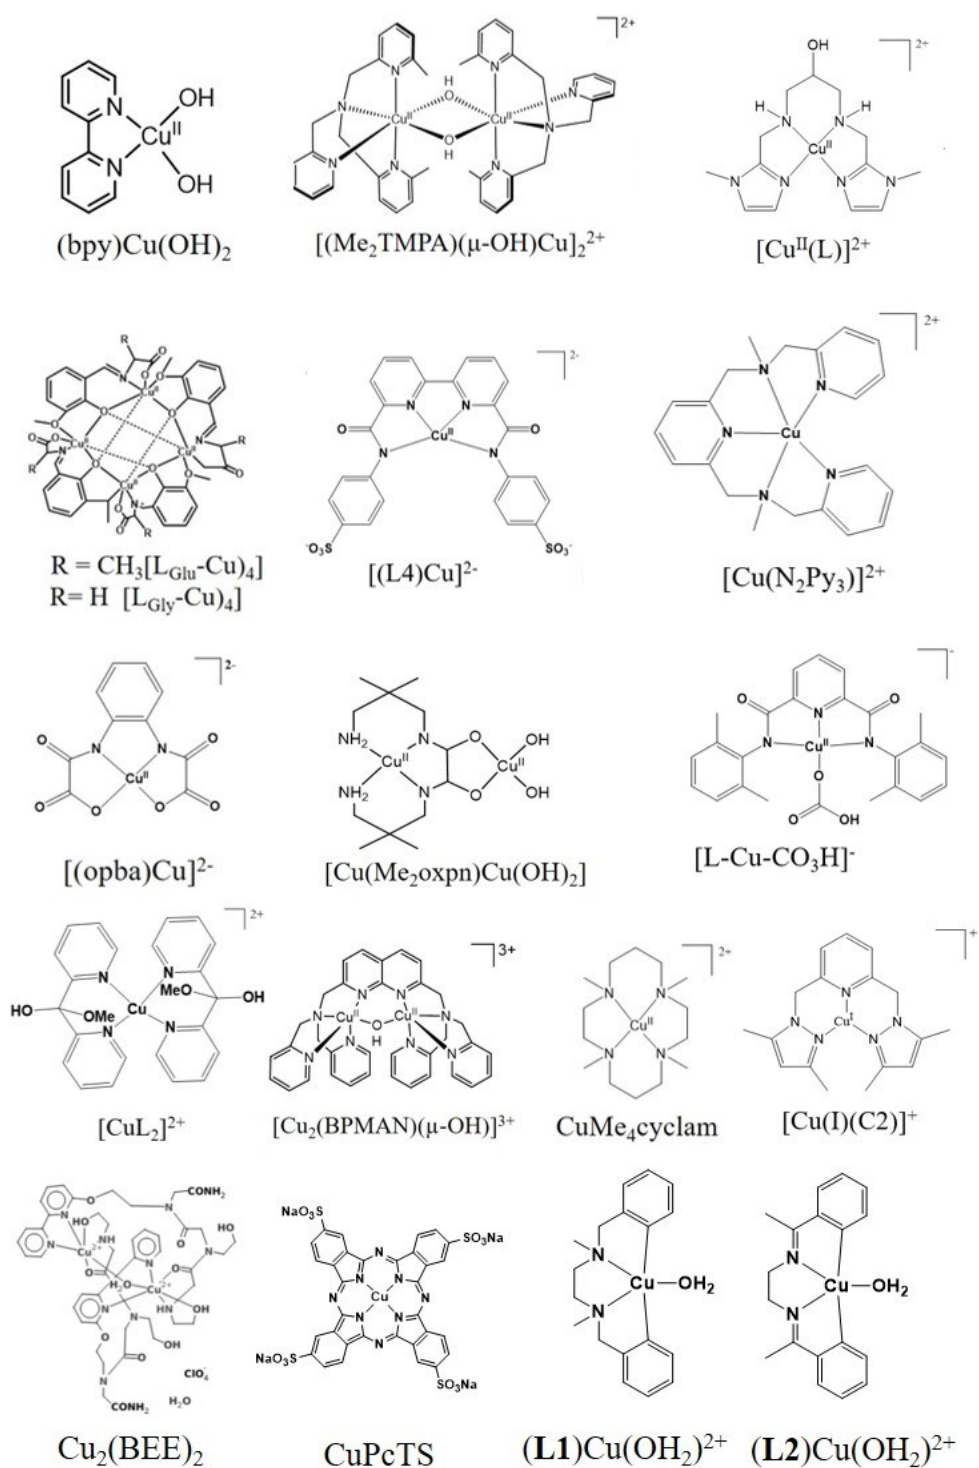

## Reference

- S1 G. Kresse and D. Joubert, *Phys. Rev. B*, 1999, **59**, 1758–1775.
- S2 P. E. Blöchl, *Phys. Rev. B*, 1994, **50**, 17953–17979.
- S3 J. P. Perdew, K. Burke and M. Ernzerhof, *Phys. Rev. Lett.*, 1996, **77**, 3865–3868.
- S4 S. Grimme, S. Ehrlich and L. Goerigk, *J. Comput. Chem.*, 2011, **32**, 1456–1465.

- S5 J. K. Nørskov, J. Rossmeisl, A. Logadottir, L. Lindqvist, J.R. Kitchin, T. Bligaard and H. Jónsson, *J. Phys. Chem. B*, 2004, **108**, 17886–17892.
- S6 J. K. Nørskov, T. Bligaard, A. Logadottir, J. R. Kitchin, J. G. Chen, S. Pandalov and U. Stimming, *J. Electrochem. Soc.*, 2005, 152.
- S7 S. M. Barnett, K. I. Goldberg and J. M. Mayer, *Nat. Chem.*, 2012, **4**, 498–502.
- S8 S. J. Koepke, K. M. Light, P. E. VanNatta, K. M. Wiley and M. T. Kieber-Emmons, *J. Am. Chem. Soc.*, 2017, **139**, 8586–8600.
- S9 S. Nestke, E. Ronge and I. Siewert. *Dalton Trans.*, 2018, **47**, 10737-10741.
- S10 X. Jiang, J. Li, B. Yang, X.-Z. Wei, B.-W. Dong, Y. Kao, M.-Y. Huang, C.-H. Tung and L.-Z. Wu, *Angew. Chem. Int. Ed.*, 2018, **57**, 7850–7854.
- S11 M. Gil-Sepulcre, P. Garrido-Barros, J. Oldengott, I. Funes-Ardoiz, R. Bofill, X. Sala, J. Benet-Buchholz and A. Llobet, *Angew. Chem. Int. Ed.*, 2021, **60**, 18639–18644.
- S12 Z. Xu, Z. Zheng, Q. Chen, J. Wang, K. Yu, X. Xia, J. Shen and Q. Zhang, *Dalton Trans.*, 2021, **50**, 10888–10895.
- S13 L.-Z. Fu, T. Fang, L.-L. Zhou and S.-Z. Zhan, *RSC Adv.*, 2014, **4**, 53674–53680.
- S14 L.-L. Zhou, T. Fang, J.-P. Cao, Z.-H. Zhu, X.-T. Su and S.-Z. Zhan, *J. Power Sources.*, 2015, **273**, 298–304.
- S15 F. Chen, N. Wang, H. Lei, D. Guo, H. Liu, Z. Zhang, W. Zhang, W. Lai and R. Cao, *Inorg. Chem.*, 2017, **56**, 13368–13375.
- S16 N. N. Shi, W. J. Xie, D. M. Zhang, Y. H. Fan, L. S. Cui and M. Wang. *J. Electroanal. Chem.*, 2021, **886**, 115106.
- S17 X.-J. Su, M. Gao, L. Jiao, R.-Z. Liao, P. E. M. Siegbahn, J.-P. Cheng and M.-T. Zhang, *Angew. Chem. Int. Ed.*, 2015, **54**, 4909–4914.
- S18 A. Prevedello, I. Bazzan, N. D. Carbonare, A. Giuliani, S. Bhardwaj, C. Africh, C. Cepek, R. Argazzi, M. Bonchio, S. Caramori, M. Robert and A. Sartorel, *Chem. Asian J.*, 2016, **11**, 1281–1287.
- S19 T. Makhado, B. Das, R. J. Kriek, H. C. M. Voslooa and A. J. Swarts, *Sustainable Energy Fuels.*, 2021, **5**, 2771-2780.
- S20 G. Ruan, P. Ghosh, N. Fridman and G. Maayan, *J. Am. Chem. Soc.*, 2021, **143**, 28, 10614–10623.

- S21 R. Terao, T. Nakazono, A. R. Parent and K. Sakai, *ChemPlusChem*, 2016, **81**, 1064–1067.
- S22 J. Shen, M. Wang, J. Gao, H. Han, H. Liu and L. Sun, *ChemSusChem*, 2017, **10**, 4581–4588.
